# Supplementary material for: Alcohol consumption, DNA methylation and colorectal cancer risk: Results from pooled cohort studies and Mendelian randomization analysis
Source: PubMed Central journal article supplement (PMC9487984; doi:10.1002/ijc.33945), 2022-01-31
Supplement: IJC-151-83-s001.pdf [file IJC-151-83-s001.pdf]

# Alcohol consumption, DNA methylation and colorectal cancer risk: results from pooled cohort studies and Mendelian randomisation analysis

Xuan Zhou<sup>1†</sup>, Lijuan Wang<sup>1†</sup>, Jiarui Xiao<sup>1†</sup>, Jing Sun<sup>1</sup>, Lili Yu<sup>1</sup>, Han Zhang<sup>2</sup>, Xiangrui Meng<sup>3</sup>, Shuai Yuan<sup>4</sup>, Maria Timofeeva<sup>5,6</sup>, Philip J Law<sup>7</sup>, Richard S Houlston<sup>7</sup>, Kefeng Ding<sup>8</sup>, Malcolm Dunlop<sup>6</sup>, Evropi Theodoratou<sup>6,9\*</sup>, Xue Li<sup>1\*</sup>

## Contents

|                                                                                                                                                                   |    |
|-------------------------------------------------------------------------------------------------------------------------------------------------------------------|----|
| <b>Supplementary materials &amp; methods</b> .....                                                                                                                | 2  |
| Detailed search strategy .....                                                                                                                                    | 2  |
| Two-sample MR .....                                                                                                                                               | 3  |
| <b>Supplementary tables</b> .....                                                                                                                                 | 5  |
| Table S1. Summarized characteristics of included studies. ....                                                                                                    | 5  |
| Table S2. Detailed characteristics of included studies. ....                                                                                                      | 6  |
| Table S3. Quality assessment of included studies using the Newcastle-Ottawa Scale. ....                                                                           | 12 |
| Table S4. Genetic instruments of Two-Sample Mendelian Randomization (Drinks per week, AUD and PAU). ....                                                          | 14 |
| Table S5. Results of the MR-PRESSO analysis. ....                                                                                                                 | 19 |
| Table S6. Genetic instruments associated with potential confounders in PhenoScanner. (European ancestry, $P < 5 \times 10^{-8}$ ). ....                           | 20 |
| Table S7. Alcohol consumption-related CpG sites and mQTLs from ARIES database. ....                                                                               | 27 |
| Table S8. Two-sample Mendelian Randomization estimates of methylation at alcohol consumption-related CpG sites on CRC risk. ....                                  | 30 |
| Table S9. Characteristics of CRC incident cases and population-based controls nested in the UK Biobank. ....                                                      | 32 |
| <b>Supplementary figures</b> .....                                                                                                                                | 33 |
| Figure S1. Flowchart of the selection of eligible studies for meta-analysis. ....                                                                                 | 33 |
| CRC, colorectal cancer. ....                                                                                                                                      | 33 |
| Figure S2. Pooled RR of CRC risk for light, moderate and heavy drinkers in the meta-analysis. Light, $< 12.5$ g/d; Moderate, 12.5-50 g/d; Heavy, $> 50$ g/d. .... | 34 |
| Figure S3. Dose-response effect of alcohol drinking on CRC risk. ....                                                                                             | 35 |
| Figure S4. Regional plots of cg10045354 and mapped genes. ....                                                                                                    | 35 |
| Figure S5. Single-tissue eQTL plot of rs11213823 (cg10045354, COLCA2). ....                                                                                       | 36 |
| Figure S6. Single-tissue eQTL plot of rs11213823 (cg10045354, COLCA1). ....                                                                                       | 37 |

## Supplementary materials & methods

### Detailed search strategy

#### MEDLINE

|                                                                                                                                                                                                                                               |
|-----------------------------------------------------------------------------------------------------------------------------------------------------------------------------------------------------------------------------------------------|
| 1 alcohols/                                                                                                                                                                                                                                   |
| 2 ethanol/                                                                                                                                                                                                                                    |
| 3 drinking/                                                                                                                                                                                                                                   |
| 4 drinking behavior/                                                                                                                                                                                                                          |
| 5 exp alcohol drinking/                                                                                                                                                                                                                       |
| 6 exp alcoholic beverages/                                                                                                                                                                                                                    |
| 7 exp alcohol-related disorders/                                                                                                                                                                                                              |
| 8 ((alcohol and (consumption or drinking or intake)) or (alcohol abuse) or (alcoholic beverage*)).mp.                                                                                                                                         |
| 9 1 or 2 or 3 or 4 or 5 or 6 or 7 or 8                                                                                                                                                                                                        |
| 10 exp colorectal neoplasms/                                                                                                                                                                                                                  |
| 11 exp colonic neoplasms/                                                                                                                                                                                                                     |
| 12 exp rectal neoplasms/                                                                                                                                                                                                                      |
| 13 ((colorectal or colonic or colon or rectal or rectum or bowel* or intestine* or sigmoid) and (cancer or neoplasm* or malign* or tumor* or tumour* or carcinom* or sarcom* or adenocarcinom* or adeno?carcinom* or adenom* or lesion*)).mp. |
| 14 10 or 11 or 12 or 13                                                                                                                                                                                                                       |
| 15 exp cohort studies/                                                                                                                                                                                                                        |
| 16 cohort\$.tw.                                                                                                                                                                                                                               |
| 17 controlled clinical trial.pt.                                                                                                                                                                                                              |
| 18 15 or 16 or 17                                                                                                                                                                                                                             |
| 19 9 and 14 and 18                                                                                                                                                                                                                            |

#### Embase

|                                                                                                                                                                                                                                               |
|-----------------------------------------------------------------------------------------------------------------------------------------------------------------------------------------------------------------------------------------------|
| 1 alcohol/                                                                                                                                                                                                                                    |
| 2 alcohol consumption/                                                                                                                                                                                                                        |
| 3 drinking/                                                                                                                                                                                                                                   |
| 4 drinking behavior/                                                                                                                                                                                                                          |
| 5 alcoholism/                                                                                                                                                                                                                                 |
| 6 exp alcohol abuse/                                                                                                                                                                                                                          |
| 7 exp alcoholic beverages/                                                                                                                                                                                                                    |
| 8 ((alcohol and (consumption or drinking or intake)) or (alcohol abuse) or (alcoholic beverage*)).mp.                                                                                                                                         |
| 9 1 or 2 or 3 or 4 or 5 or 6 or 7 or 8                                                                                                                                                                                                        |
| 10 exp colon cancer/                                                                                                                                                                                                                          |
| 11 exp rectum cancer/                                                                                                                                                                                                                         |
| 12 ((colorectal or colonic or colon or rectal or rectum or bowel* or intestine* or sigmoid) and (cancer or neoplasm* or malign* or tumor* or tumour* or carcinom* or sarcom* or adenocarcinom* or adeno?carcinom* or adenom* or lesion*)).mp. |

|                               |
|-------------------------------|
| 13 10 or 11 or 12             |
| 14 cohort analysis/           |
| 15 longitudinal study/        |
| 16 prospective study/         |
| 17 follow up/                 |
| 18 cohort\$.tw.               |
| 19 14 or 15 or 16 or 17 or 18 |
| 20 9 and 13 and 19            |

BIOSIS Citation index

|                                                                                                                                                                                                                                                    |
|----------------------------------------------------------------------------------------------------------------------------------------------------------------------------------------------------------------------------------------------------|
| 1 TS=alcohols/                                                                                                                                                                                                                                     |
| 2 TS=ethanol/                                                                                                                                                                                                                                      |
| 3 TS=drinking/                                                                                                                                                                                                                                     |
| 4 TS=drinking behavior/                                                                                                                                                                                                                            |
| 5 TS=exp alcohol drinking/                                                                                                                                                                                                                         |
| 6 TS=exp alcoholic beverages/                                                                                                                                                                                                                      |
| 7 TS=exp alcohol-related disorders/                                                                                                                                                                                                                |
| 8 TS= ((alcohol and (consumption or drinking or intake)) or (alcohol abuse) or (alcoholic beverage*)).mp.                                                                                                                                          |
| 9 1 or 2 or 3 or 4 or 5 or 6 or 7 or 8                                                                                                                                                                                                             |
| 10 TS=exp colorectal neoplasms/                                                                                                                                                                                                                    |
| 11 TS=exp colonic neoplasms/                                                                                                                                                                                                                       |
| 12 TS=exp rectal neoplasms/                                                                                                                                                                                                                        |
| 13 TS= ((colorectal or colonic or colon or rectal or rectum or bowel* or intestine* or sigmoid) NEAR (cancer or neoplasm* or malign* or tumor* or tumour* or carcinom* or sarcom* or adenocarcinom* or adeno?carcinom* or adenom* or lesion*)).mp. |
| 14 10 or 11 or 12 or 13                                                                                                                                                                                                                            |
| 15 TS=cohort analysis/                                                                                                                                                                                                                             |
| 16 TS=longitudinal study/                                                                                                                                                                                                                          |
| 17 TS=prospective study/                                                                                                                                                                                                                           |
| 18 TS=follow up/                                                                                                                                                                                                                                   |
| 19 TS=cohort\$.tw.                                                                                                                                                                                                                                 |
| 20 15 or 16 or 17 or 18 or 19                                                                                                                                                                                                                      |
| 21 9 and 14 and 20                                                                                                                                                                                                                                 |

**Two-sample MR**

Mendelian randomization (MR) design provides a cost-effective analogy to a randomized controlled trial by using genetic variants as proxies to test the causality of an association between exposure and outcome of interest. Here we applied inverse-variance weighted MR approach as the main analysis, and the simple mode, Egger, weighted median and weighted mode as sensitivity analyses to explore the robustness of the findings. Details of these MR approaches, including their different assumptions, are explained as

below.

Mean-based methods: The inverse variance weighted (IVW) MR and Egger MR provide two mean-based estimators. The IVW MR approach assumes that variants exhibit no horizontal pleiotropy, while Egger regression relaxes the horizontal pleiotropy assumption further by allowing a non-zero intercept which essentially allows overall horizontal pleiotropy to be directional, where its total effect influences the outcome in a specific direction. Egger regression further allows heterogeneity around the slope having accounted for overall directional horizontal pleiotropy, as long as the horizontal pleiotropy effects are not correlated with the SNP-exposure effects (also known as the INSIDE assumption).

Median-based methods: This analytical approach takes the median effect of all available instruments. The sample median method requires that half the instruments need to be valid to obtain unbiased estimate. The weighted median method allows stronger instruments to contribute more towards the estimate and obtain an estimate by weighting the contribution of each instrument by the inverse of its variance.

Mode-based methods: The mode-based estimator clusters the instruments into groups based on similarity of causal effects, and returns the final causal effect estimate based on the cluster that has the largest number of instruments. This provide two mode-based estimators: the simple mode is the unweighted mode of the empirical density function of causal estimates, the weighted mode is weighted by the inverse variance of the outcome effect.

MR-PRESSO: The MR-PRESSO is applied for the global test, outlier test, and distortion test using the MR pleiotropy residual sum and outlier (MR-PRESSO) R package. Specifically, the global test detects horizontal pleiotropy among the MR instruments; the outlier test corrects for horizontal pleiotropy via outlier removal; the distortion test identifies significant distortion in the causal estimates before and after outlier removal.

## Supplementary tables

**Table S1. Summarized characteristics of included studies.**

| Characteristics    |                            | No. of studies | Proportion (%) |
|--------------------|----------------------------|----------------|----------------|
| Outcome            | Incidence                  | 25             | 78.1           |
|                    | Mortality                  | 7              | 21.9           |
| Geographic area    | North America              | 11             | 34.4           |
|                    | Europe                     | 9              | 28.1           |
|                    | Asia                       | 10             | 31.3           |
|                    | Others/Mixed               | 2              | 6.3            |
| Sex                | M                          | 5              | 15.6           |
|                    | W                          | 2              | 6.3            |
|                    | M+W                        | 15             | 46.8           |
|                    | T                          | 10             | 31.2           |
| Anatomical site    | C                          | 3              | 9.4            |
|                    | R                          | 0              | 0.0            |
|                    | C+R                        | 11             | 34.4           |
|                    | CR                         | 18             | 56.3           |
| Reference category | Without ex-drinker         | 10             | 31.3           |
|                    | With ex-drinker/Unknown    | 22             | 68.8           |
|                    | Without occasional drinker | 24             | 75.0           |
|                    | With occasional drinker    | 8              | 25.0           |

**Table S2. Detailed characteristics of included studies.**

| Author and year | Population                                                                                                                                                       |             |                                    |         | Exposure assessment           |                                       |                                                                                                                                                                                                                                                              | Outcome evaluation    |           |          |                        |
|-----------------|------------------------------------------------------------------------------------------------------------------------------------------------------------------|-------------|------------------------------------|---------|-------------------------------|---------------------------------------|--------------------------------------------------------------------------------------------------------------------------------------------------------------------------------------------------------------------------------------------------------------|-----------------------|-----------|----------|------------------------|
|                 | Cohort description and country                                                                                                                                   | Sample size | Age                                | Sex     | Ex-drinker in reference group | Occasional drinker in reference group | Adjusted factors                                                                                                                                                                                                                                             | Follow-up             | Outcome   | Site     | Events                 |
| Bamia 2013      | European Prospective Investigation into Cancer and nutrition (EPIC), Mixed (Denmark, France, Germany, Greece, Italy, Netherlands, Norway, Spain, Sweden, and UK) | 480308      | Unknown                            | M, W, T | Unknown                       | N                                     | sex, age at enrolment, body mass index, physical activity, educational level, smoking status at enrolment                                                                                                                                                    | 11.6 years on average | Incidence | CR       | 4355                   |
| Betts 2018      | Health and Lifestyle Survey (HALS1), UK                                                                                                                          | 6 721       | M: 47.90 (17.90); W: 48.00 (18.02) | M, W    | N                             | N                                     | Ethnicity, income, self-rated health, smoking status, BMI, and exercise                                                                                                                                                                                      | 1984-2009             | Incidence | CR       | 117                    |
| Bradbury 2020   | UK Biobank, UK                                                                                                                                                   | 473 138     | 40-69                              | T       | Unknown                       | Y                                     | Education, smoking status, waist circumference, height, physical activity, family history of CRC, aspirin or ibuprofen use, use of vitamin D supplements, use of folate supplements. For women only: parity, menopause, oral contraceptive agent and HRT use | 2006-2014             | Incidence | C, R, CR | 2 599 (1 735 C, 864 R) |
| Breslow 2011    | National Health Interview Survey (NHIS), USA                                                                                                                     | 323 354     | >=18                               | M, W, T | N                             | N                                     | Race/ethnicity, education, region, marital status, smoking status, BMI, and gender                                                                                                                                                                           | 1988-2006             | Mortality | CR       | 850                    |

|                    |                                                                                                         |            |              |         |         |   |                                                                                                                                                                                                                                                                                                                                     |           |           |          |                            |
|--------------------|---------------------------------------------------------------------------------------------------------|------------|--------------|---------|---------|---|-------------------------------------------------------------------------------------------------------------------------------------------------------------------------------------------------------------------------------------------------------------------------------------------------------------------------------------|-----------|-----------|----------|----------------------------|
| Buron Pust<br>2017 | Million Women Study, UK                                                                                 | 1 310 390  | 56.1 (4.6)   | W       | Unknown | Y | Socioeconomic status, height, BMI, smoking, strenuous exercise, age at menarche, births, hysterectomy, sterilisation, age at menopause, oral contraceptive use, and HRT use                                                                                                                                                         | 1988-2013 | Incidence | C, R, CR | 18 518 (12 761 C, 5 757 R) |
| Cho 2004           | Pooling Project of Prospective Studies of Diet and Cancer, Mixed (Canada, Netherlands, Sweden, and USA) | 489 979    | 15-107       | M, W, T | Unknown | N | Smoking, BMI, education, height, degree of physical activity, family history of colorectal cancer, use of nonsteroidal anti-inflammatory drugs, use of multivitamins, energy intake, red meat intake, total milk intake, folate intake from food only. For women only: history of use of oral contraceptives and postmenopausal HRT | 1980-1998 | Incidence | C, R, CR | 4 687 (3 291 C, 1370 R)    |
| Cho 2015           | Korean Multi-center Cancer Cohort, Korea                                                                | 18 522     | $\geq 20$    | M, W    | N       | N | BMI, moderate physical activity, and cigarette smoking history                                                                                                                                                                                                                                                                      | 1993-2011 | Incidence | CR       | 220                        |
| Choi 2017          | National Health Insurance Corporation (NHIC), Korea                                                     | 23 179 312 | $\geq 20$    | M, W, T | Unknown | N | Age, sex, exercise, income, BMI, diabetes mellitus, and smoking status                                                                                                                                                                                                                                                              | 2009-2012 | Incidence | CR       | 154 868                    |
| Chyou 1996         | Japanese-American men in Hawaii, USA                                                                    | 7 945      | $\geq 45$    | M       | Unknown | N | Age                                                                                                                                                                                                                                                                                                                                 | 1965-1995 | Incidence | C, R     | 453 (330 C, 123 R)         |
| Flood 2002         | Breast Cancer Detection Demonstration Project (BCDDP), USA                                              | 45 264     | 61.9 (40-93) | W       | Unknown | N | Energy, dietary folate, methionine, and smoking                                                                                                                                                                                                                                                                                     | 1987-1998 | Incidence | CR       | 490                        |

|                    |                                                        |           |                   |         |         |   |                                                                                                                                                                   |           |           |          |                    |
|--------------------|--------------------------------------------------------|-----------|-------------------|---------|---------|---|-------------------------------------------------------------------------------------------------------------------------------------------------------------------|-----------|-----------|----------|--------------------|
| Gaziano 2000       | Physicians' Health Study, USA                          | 89 299    | 40-84             | M       | Y       | Y | Age, smoking, diabetes, exercise and BMI                                                                                                                          | 1982-1989 | Mortality | C        | 101                |
| Hippisley-Cox 2015 | QResearch database, UK                                 | 4 943 765 | 25-84             | M, W    | Unknown | N | Age, BMI, Townsend score, ethnic group, smoking status, family history of colorectal cancer, ulcerative colitis, colonic polyp, and prior history of other cancer | 1998-2013 | Incidence | CR       | 32 626             |
| Jayasekara 2017    | Melbourne Collaborative Cohort Study (MCCS), Australia | 38 149    | 40-69, 55.2 (8.6) | M, W, T | N       | N | Sex, education, socioeconomic status, smoking, physical activity, energy intake from food, dietary fiber, dietary folate and total red meat                       | 1990-2008 | Incidence | C, R, CR | 922 (596 C, 326 R) |
| Jo 2019            | Korean Genome and Epidemiology Study (KoGES), Korea    | 2 327     | 40-69             | T       | N       | N | Age, gender, living with spouse, educational level, income level, subjective health status, BMI, and cigarette smoking                                            | 2001-2014 | Incidence | C        | 46                 |
| Klatsky 2015       | Northern California Kaiser Permanente, USA             | 124 193   | 41                | T       | N       | N | Age, sex, race/ethnicity, BMI, education, marital status, and smoking                                                                                             | 1978-2012 | Incidence | CR       | 2 148              |
| Kono 1987          | Male physicians in Western Japan, Japan                | 5 130     | 49 (27-89)        | M       | Y       | Y | Age and smoking                                                                                                                                                   | 1965-1983 | Mortality | CR       | 39                 |



|                  |                                                                                  |         |         |         |         |   |                                                                                                                                                                                                                                                                                                                                                                       |           |           |          |                              |
|------------------|----------------------------------------------------------------------------------|---------|---------|---------|---------|---|-----------------------------------------------------------------------------------------------------------------------------------------------------------------------------------------------------------------------------------------------------------------------------------------------------------------------------------------------------------------------|-----------|-----------|----------|------------------------------|
| Kunzmann<br>2018 | Prostate, Lung, Colorectal, and<br>Ovarian (PLCO) Cancer<br>Screening Trial, USA | 99 654  | 65 (10) | T       | N       | N | Study centre, race, BMI,<br>randomisation group,<br>smoking status by pack-<br>years, year of DHQ<br>completion, marital status,<br>educational attainment,<br>family history of cancer,<br>HRT use, coffee intake,<br>energy intake, red meat<br>intakes, processed meat<br>intakes, fruit and vegetable<br>intake, dietary fibre intake<br>and total calcium intake | 1998-2009 | Incidence | CR       | 944                          |
| Lim 2008         | Korea Elderly<br>Pharmacoepidemiologic<br>Cohort (KEPEC), Korea                  | 14 304  | >=65    | T       | Unknown | N | Age and gender                                                                                                                                                                                                                                                                                                                                                        | 1993-2002 | Incidence | CR       | 112                          |
| Mizoue 2008      | Pooled analysis of five cohort<br>studies, Japan                                 | 209 763 | >=35    | M, W    | Unknown | N | Age, smoking, BMI,<br>intakes of energy, red meat,<br>calcium, fiber, and folate,<br>and area (adjusted in three<br>cohorts)                                                                                                                                                                                                                                          | 1988-2004 | Incidence | C, R, CR | 2 802 (1<br>829 C, 967<br>R) |
| Park 2019        | Multiethnic Cohort Study<br>(MEC), USA                                           | 190 698 | 45-75   | M, W, T | Unknown | N | Age at cohort entry, sex,<br>race/ethnicity, family<br>history of CRC, history of<br>colorectal polyps, BMI,<br>pack-years of cigarette<br>smoking, multivitamin use,<br>NSAID use, physical<br>activity, menopausal HRT<br>use, and daily intakes of<br>total energy, red meat,<br>dietary fiber, calcium,<br>folate, and vitamin D                                  | 1993-2013 | Incidence | C, R, CR | 4 923 (3<br>257 C, 988<br>R) |

|                 |                                                                                    |         |                                |         |         |   |                                                                                                                                                                               |           |           |      |                    |
|-----------------|------------------------------------------------------------------------------------|---------|--------------------------------|---------|---------|---|-------------------------------------------------------------------------------------------------------------------------------------------------------------------------------|-----------|-----------|------|--------------------|
| Pedersen 2003   | Copenhagen Centre for Prospective Population Studies, Denmark                      | 426 934 | Unknown                        | T       | Unknown | Y | Age, sex, smoking, BMI, and study of origin                                                                                                                                   | 1976-1993 | Incidence | C, R | 613 (411 C, 202 R) |
| Sanjoaquin 2004 | Oxford Vegetarian Study, UK                                                        | 11 140  | 33 (median)                    | T       | Unknown | Y | Age, sex, and smoking                                                                                                                                                         | 1980-1999 | Incidence | CR   | 95                 |
| Shen 2013       | 18 elderly health centres in Hong Kong, China                                      | 66 820  | >=65                           | M, W, T | N       | N | Age, education, housing type, monthly expenditure, BMI, exercise, health status, smoking status and smoking×age                                                               | 1998-2012 | Mortality | CR   | 944                |
| Su 2004         | Nutrition Examination Survey (NHANES I) Epidemiologic Follow-up Study (NHEFS), USA | 10 418  | M: 58.5 (14.7); W: 56.1 (14.8) | T       | N       | N | Age, sex, race, BMI, educational level, nonpoultry meat consumption, poultry and seafood consumption, regular multivitamin use, history of colonic polyps, and smoking status | 1982-1993 | Incidence | CR   | 111                |
| Thun 1997       | Cancer Prevention Study II, USA                                                    | 457 423 | 56 (30-104)                    | M, W    | N       | N | Education, BMI, smoking, a crude index of fat consumption, and vegetable consumption                                                                                          | 1982-1991 | Mortality | CR   | 1 427              |
| Toriola 2008    | Findrink study, Finland                                                            | 2 682   | 42-61                          | M       | Unknown | Y | Age, examination year, vegetable consumption, fibre intake, family history of cancer, smoking, socio-economic status and leisure time physical activity                       | 1984-2005 | Incidence | CR   | 59                 |

|              |                                                                                               |         |              |      |         |   |                                                                                                                                                                                    |                     |           |          |                          |
|--------------|-----------------------------------------------------------------------------------------------|---------|--------------|------|---------|---|------------------------------------------------------------------------------------------------------------------------------------------------------------------------------------|---------------------|-----------|----------|--------------------------|
| Tsong 2007   | Singapore Chinese Health Study, Singapore                                                     | 61 321  | 45-74        | T    | Unknown | N | Age, gender, dialect group, year of recruitment, level of education, BMI, history of diabetes, family history of colorectal cancer, cigarette smoking level, and physical exercise | 1993-2004           | Incidence | C, R, CR | 845 (516 C, 329 R)       |
| Tverdal 2021 | Norwegian population-based health surveys, year 40 programme and the cohort of Norway, Norway | 250 010 | 20-79        | M, W | Unknown | N | Age, HDL-cholesterol, total cholesterol, triglycerides, number of cigarettes/day, systolic blood pressure, education, BMI, height, physical activity, and marriage status          | 18 years on average | Incidence | C, R     | 4 462 (3 023 C, 1 429 R) |
| Viner 2019   | Alberta's Tomorrow Project (ATP), Canada                                                      | 26 607  | 35-69        | M, W | Unknown | N | Age, sex, BMI, marital status, highest level of education, total household income, smoking status, pack-years of cigarettes, and history of colon cancer screening                 | 2001-2017           | Incidence | C        | 192                      |
| Wu 1987      | A retirement community south of Los Angeles, USA                                              | 11 644  | Unknown      | M, W | Unknown | Y | Age                                                                                                                                                                                | 1981-1985           | Incidence | CR, C    | 126                      |
| Yang 2012    | 45 China's national Disease Surveillance Points, China                                        | 218 189 | 54.3 (40-79) | M    | Unknown | N | Age, area, smoking and education                                                                                                                                                   | 1990-2006           | Mortality | CR       | 256                      |
| Yi 2020      | Kangwha Cohort, Korea                                                                         | 6 291   | >=55         | T    | Unknown | N | Age, history of chronic disease, smoking habit, ginseng intake, pesticide use, BMI, and education status                                                                           | 1985-2005           | Mortality | C, R, CR | 42 (29 C, 13 R)          |



|                    |   |   |   |   |   |   |   |   |   |   |
|--------------------|---|---|---|---|---|---|---|---|---|---|
| Pedersen 2003      | 1 | 1 | 1 | 1 | 1 | 1 | 1 | 1 | 1 | 9 |
| Sanjoaquin<br>2004 | 0 | 1 | 1 | 1 | 0 | 1 | 1 | 1 | 1 | 7 |
| Shen 2013          | 1 | 1 | 1 | 1 | 1 | 1 | 1 | 1 | 1 | 9 |
| Su 2004            | 1 | 1 | 1 | 1 | 1 | 1 | 1 | 1 | 1 | 9 |
| Thun 1997          | 1 | 1 | 1 | 1 | 1 | 1 | 1 | 1 | 1 | 9 |
| Toriola 2008       | 1 | 1 | 1 | 1 | 0 | 1 | 1 | 1 | 1 | 8 |
| Tsong 2007         | 1 | 1 | 1 | 1 | 1 | 1 | 1 | 1 | 1 | 9 |
| Tverdal 2021       | 1 | 1 | 1 | 1 | 1 | 1 | 1 | 1 | 1 | 9 |
| Viner 2019         | 1 | 1 | 1 | 1 | 1 | 1 | 1 | 1 | 1 | 9 |
| Wu 1987            | 1 | 1 | 1 | 1 | 0 | 0 | 1 | 0 | 1 | 6 |
| Yang 2012          | 1 | 1 | 1 | 1 | 0 | 1 | 1 | 1 | 1 | 8 |
| Yi 2020            | 1 | 1 | 1 | 1 | 1 | 1 | 1 | 1 | 1 | 9 |

a Age, sex, and BMI.

b Other factors that are associated with colorectal cancer, including physical activity, smoking, red meat consumption, etc.

c Longer than five years follow-up.

d Follow-up rate more than 80%.

**Table S4. Genetic instruments of Two-Sample Mendelian Randomization (Drinks per week, AUD and PAU).**

| Phenotype       | SNP        | Chr | Pos       | beta      | SE       | P value   | Effect allele | Other allele | EAF   | F Statistic |
|-----------------|------------|-----|-----------|-----------|----------|-----------|---------------|--------------|-------|-------------|
| Drinks Per Week | rs705687   | 1   | 4548453   | -0.010904 | 0.001776 | 8.15E-10  | G             | A            | 0.785 | 37.7        |
| Drinks Per Week | rs58107686 | 1   | 33837334  | -0.009747 | 0.001585 | 7.79E-10  | A             | C            | 0.328 | 37.8        |
| Drinks Per Week | rs12088813 | 1   | 66407700  | -0.009329 | 0.001649 | 1.58E-08  | C             | A            | 0.267 | 32          |
| Drinks Per Week | rs5024204  | 1   | 71491890  | 0.009703  | 0.001628 | 2.55E-09  | T             | A            | 0.278 | 35.5        |
| Drinks Per Week | rs10753661 | 1   | 165119792 | -0.008638 | 0.001569 | 3.76E-08  | A             | G            | 0.684 | 30.3        |
| Drinks Per Week | rs28680958 | 1   | 173848808 | -0.010996 | 0.00177  | 5.13E-10  | A             | G            | 0.217 | 38.6        |
| Drinks Per Week | rs823114   | 1   | 205719532 | 0.008768  | 0.001467 | 2.31E-09  | A             | G            | 0.553 | 35.7        |
| Drinks Per Week | rs77165542 | 2   | 430975    | -0.026011 | 0.003971 | 5.63E-11  | T             | C            | 0.035 | 42.9        |
| Drinks Per Week | rs1260326  | 2   | 27730940  | 0.02089   | 0.001488 | 8.05E-45  | C             | T            | 0.601 | 197         |
| Drinks Per Week | rs13383034 | 2   | 45155276  | 0.014927  | 0.001551 | 6.31E-22  | T             | C            | 0.329 | 92.6        |
| Drinks Per Week | rs13032049 | 2   | 63581507  | 0.010195  | 0.001618 | 3.00E-10  | G             | A            | 0.283 | 39.7        |
| Drinks Per Week | rs828867   | 2   | 74334462  | 0.008757  | 0.001464 | 2.15E-09  | A             | G            | 0.545 | 35.8        |
| Drinks Per Week | rs11692435 | 2   | 98275354  | 0.01745   | 0.002616 | 2.53E-11  | A             | G            | 0.085 | 44.5        |
| Drinks Per Week | rs13024996 | 2   | 144225215 | -0.010913 | 0.001515 | 5.72E-13  | A             | C            | 0.364 | 51.9        |
| Drinks Per Week | rs72859280 | 2   | 147956293 | 0.022885  | 0.003902 | 4.44E-09  | T             | G            | 0.036 | 34.4        |
| Drinks Per Week | rs56337305 | 2   | 225475560 | -0.009588 | 0.001499 | 1.63E-10  | C             | T            | 0.383 | 40.9        |
| Drinks Per Week | rs13094887 | 3   | 70968431  | -0.01031  | 0.001589 | 8.57E-11  | T             | A            | 0.301 | 42.1        |
| Drinks Per Week | rs62250685 | 3   | 85457240  | -0.014357 | 0.0015   | 1.05E-21  | G             | A            | 0.614 | 91.6        |
| Drinks Per Week | rs13066454 | 3   | 93994255  | -0.008776 | 0.001492 | 4.13E-09  | T             | C            | 0.398 | 34.6        |
| Drinks Per Week | rs9838144  | 3   | 131576287 | -0.009964 | 0.001793 | 2.65E-08  | C             | G            | 0.209 | 30.9        |
| Drinks Per Week | rs2011092  | 3   | 141124607 | -0.0089   | 0.00154  | 7.35E-09  | C             | T            | 0.339 | 33.4        |
| Drinks Per Week | rs6787172  | 3   | 158187811 | -0.008031 | 0.001466 | 4.27E-08  | G             | T            | 0.554 | 30          |
| Drinks Per Week | rs3748034  | 4   | 3446091   | -0.01174  | 0.002082 | 1.67E-08  | T             | G            | 0.143 | 31.8        |
| Drinks Per Week | rs11940694 | 4   | 39414993  | 0.02595   | 0.001486 | 3.03E-68  | G             | A            | 0.597 | 305         |
| Drinks Per Week | rs4501255  | 4   | 42151306  | 0.010693  | 0.001719 | 4.83E-10  | G             | C            | 0.235 | 38.7        |
| Drinks Per Week | rs1229984  | 4   | 100239319 | 0.150534  | 0.003861 | <2.2E-308 | C             | T            | 0.963 | 1520        |
| Drinks Per Week | rs36052336 | 4   | 100273594 | -0.018429 | 0.003034 | 1.23E-09  | G             | A            | 0.061 | 36.9        |
| Drinks Per Week | rs2165670  | 4   | 100286085 | 0.02308   | 0.002364 | 1.67E-22  | A             | G            | 0.106 | 95.3        |

|                 |            |    |           |           |          |          |   |   |       |      |
|-----------------|------------|----|-----------|-----------|----------|----------|---|---|-------|------|
| Drinks Per Week | rs79139602 | 4  | 100444363 | 0.060272  | 0.005076 | 1.80E-32 | T | A | 0.021 | 141  |
| Drinks Per Week | rs4699791  | 4  | 101243023 | 0.018571  | 0.002477 | 6.58E-14 | A | G | 0.096 | 56.2 |
| Drinks Per Week | rs13107325 | 4  | 103188709 | -0.027505 | 0.002816 | 1.53E-22 | T | C | 0.072 | 95.4 |
| Drinks Per Week | rs4690727  | 4  | 143648579 | 0.010817  | 0.00162  | 2.43E-11 | G | C | 0.718 | 44.6 |
| Drinks Per Week | rs12651313 | 4  | 171086393 | -0.008643 | 0.001467 | 3.79E-09 | G | C | 0.443 | 34.7 |
| Drinks Per Week | rs4916723  | 5  | 87854395  | -0.009952 | 0.001479 | 1.72E-11 | C | A | 0.416 | 45.3 |
| Drinks Per Week | rs12655091 | 5  | 144412335 | -0.008312 | 0.00146  | 1.25E-08 | A | G | 0.53  | 32.4 |
| Drinks Per Week | rs55872084 | 5  | 155902003 | 0.009979  | 0.001719 | 6.32E-09 | T | G | 0.235 | 33.7 |
| Drinks Per Week | rs6460047  | 7  | 73042443  | 0.011624  | 0.001796 | 9.69E-11 | C | T | 0.208 | 41.9 |
| Drinks Per Week | rs10236149 | 7  | 98977515  | -0.013498 | 0.002219 | 1.18E-09 | G | A | 0.123 | 37   |
| Drinks Per Week | rs35034355 | 7  | 103840115 | -0.008097 | 0.001459 | 2.87E-08 | A | G | 0.521 | 30.8 |
| Drinks Per Week | rs6951574  | 7  | 153489744 | 0.013222  | 0.001463 | 1.58E-19 | C | T | 0.458 | 81.7 |
| Drinks Per Week | rs13250583 | 8  | 20949917  | -0.009718 | 0.00178  | 4.70E-08 | T | C | 0.213 | 29.8 |
| Drinks Per Week | rs1217091  | 8  | 64527399  | 0.012161  | 0.001865 | 7.05E-11 | C | T | 0.812 | 42.5 |
| Drinks Per Week | rs28601761 | 8  | 126500031 | 0.009103  | 0.001477 | 7.17E-10 | G | C | 0.42  | 38   |
| Drinks Per Week | rs55932213 | 9  | 108755622 | 0.009488  | 0.001654 | 9.55E-09 | G | A | 0.736 | 32.9 |
| Drinks Per Week | rs10978550 | 9  | 109345993 | -0.011748 | 0.001802 | 7.15E-11 | C | T | 0.206 | 42.5 |
| Drinks Per Week | rs7074871  | 10 | 110507806 | -0.0094   | 0.001672 | 1.86E-08 | A | G | 0.255 | 31.6 |
| Drinks Per Week | rs17665139 | 10 | 125093880 | -0.01156  | 0.002047 | 1.59E-08 | T | C | 0.149 | 31.9 |
| Drinks Per Week | rs7950166  | 11 | 8642218   | -0.009799 | 0.001516 | 9.89E-11 | T | C | 0.637 | 41.8 |
| Drinks Per Week | rs11030084 | 11 | 27643725  | -0.010607 | 0.001881 | 1.72E-08 | T | C | 0.184 | 31.8 |
| Drinks Per Week | rs56030824 | 11 | 47397353  | -0.011602 | 0.001563 | 1.15E-13 | A | G | 0.322 | 55.1 |
| Drinks Per Week | rs10750025 | 11 | 113424042 | 0.010321  | 0.00157  | 4.89E-11 | T | C | 0.686 | 43.2 |
| Drinks Per Week | rs1713676  | 11 | 113660576 | -0.007992 | 0.001459 | 4.29E-08 | G | A | 0.522 | 30   |
| Drinks Per Week | rs4938230  | 11 | 116075001 | 0.01281   | 0.001998 | 1.48E-10 | A | C | 0.842 | 41.1 |
| Drinks Per Week | rs682011   | 11 | 121544285 | 0.008212  | 0.001468 | 2.22E-08 | C | T | 0.559 | 31.3 |
| Drinks Per Week | rs12795042 | 11 | 133658168 | -0.008319 | 0.001504 | 3.25E-08 | C | A | 0.623 | 30.6 |
| Drinks Per Week | rs10876188 | 12 | 51895882  | -0.007987 | 0.001463 | 4.84E-08 | T | C | 0.457 | 29.8 |
| Drinks Per Week | rs3809162  | 12 | 54674235  | 0.009061  | 0.00149  | 1.19E-09 | G | A | 0.397 | 37   |
| Drinks Per Week | rs10506274 | 12 | 81601464  | -0.009037 | 0.001458 | 5.78E-10 | T | G | 0.484 | 38.4 |
| Drinks Per Week | rs4842786  | 12 | 92170791  | -0.008798 | 0.001479 | 2.73E-09 | A | G | 0.584 | 35.4 |
| Drinks Per Week | rs500321   | 13 | 27124360  | -0.009669 | 0.001653 | 4.92E-09 | T | A | 0.736 | 34.2 |

|                      |             |    |           |           |          |           |   |   |       |        |
|----------------------|-------------|----|-----------|-----------|----------|-----------|---|---|-------|--------|
| Drinks Per Week      | rs1123285   | 14 | 57274519  | -0.008897 | 0.001544 | 8.14E-09  | G | C | 0.335 | 33.2   |
| Drinks Per Week      | rs2180870   | 14 | 58782779  | -0.012178 | 0.002133 | 1.12E-08  | C | T | 0.135 | 32.6   |
| Drinks Per Week      | rs28929474  | 14 | 94844947  | -0.0368   | 0.005438 | 1.34E-11  | T | C | 0.018 | 45.8   |
| Drinks Per Week      | rs11625650  | 14 | 104610138 | -0.009568 | 0.001724 | 2.89E-08  | A | G | 0.233 | 30.8   |
| Drinks Per Week      | rs2472297   | 15 | 75027880  | 0.010606  | 0.001685 | 3.10E-10  | T | C | 0.249 | 39.6   |
| Drinks Per Week      | rs12907323  | 15 | 86796012  | 0.008497  | 0.001481 | 9.93E-09  | G | A | 0.411 | 32.9   |
| Drinks Per Week      | rs2764771   | 16 | 20013793  | 0.009891  | 0.001582 | 4.02E-10  | A | G | 0.307 | 39.1   |
| Drinks Per Week      | rs17177078  | 16 | 24810681  | -0.022315 | 0.003012 | 1.27E-13  | T | C | 0.063 | 54.9   |
| Drinks Per Week      | rs378421    | 16 | 28754684  | -0.011205 | 0.001487 | 4.83E-14  | A | G | 0.404 | 56.8   |
| Drinks Per Week      | rs113443718 | 16 | 29892184  | -0.010208 | 0.001585 | 1.19E-10  | A | G | 0.305 | 41.5   |
| Drinks Per Week      | rs62044525  | 16 | 64872590  | -0.012173 | 0.001883 | 1.03E-10  | G | C | 0.184 | 41.8   |
| Drinks Per Week      | rs7185555   | 16 | 69131281  | -0.011101 | 0.002027 | 4.24E-08  | C | G | 0.153 | 30     |
| Drinks Per Week      | rs79616692  | 16 | 72338507  | 0.016302  | 0.002351 | 4.11E-12  | C | G | 0.108 | 48.1   |
| Drinks Per Week      | rs1104608   | 16 | 73912588  | -0.010975 | 0.001476 | 1.05E-13  | C | G | 0.425 | 55.3   |
| Drinks Per Week      | rs4548913   | 17 | 2209888   | -0.00836  | 0.001511 | 3.11E-08  | A | G | 0.632 | 30.6   |
| Drinks Per Week      | rs3803800   | 17 | 7462969   | 0.011379  | 0.001777 | 1.50E-10  | G | A | 0.786 | 41     |
| Drinks Per Week      | rs2854334   | 17 | 29715500  | 0.009221  | 0.001498 | 7.51E-10  | G | A | 0.615 | 37.9   |
| Drinks Per Week      | rs2532276   | 17 | 44246624  | -0.0218   | 0.002559 | 1.62E-17  | A | C | 0.215 | 72.6   |
| Drinks Per Week      | rs10438820  | 17 | 78524597  | 0.008972  | 0.001593 | 1.76E-08  | T | C | 0.702 | 31.7   |
| Drinks Per Week      | rs9950000   | 18 | 53052169  | -0.009118 | 0.001491 | 9.38E-10  | T | C | 0.395 | 37.4   |
| Drinks Per Week      | rs4092465   | 18 | 55080437  | -0.008292 | 0.001514 | 4.39E-08  | G | A | 0.635 | 30     |
| Drinks Per Week      | rs281379    | 19 | 49214274  | 0.013722  | 0.001458 | 4.91E-21  | A | G | 0.508 | 88.6   |
| Drinks Per Week      | rs4815364   | 20 | 25035711  | 0.008582  | 0.001499 | 1.02E-08  | A | G | 0.616 | 32.8   |
| Drinks Per Week      | rs9607814   | 22 | 41946519  | -0.010181 | 0.001859 | 4.31E-08  | A | C | 0.2   | 30     |
| Alcohol Use Disorder | rs12743648  | 1  | 66428502  | -0.023427 | 0.004014 | 5.34E-09  | T | G | 0.234 | 61.82  |
| Alcohol Use Disorder | rs494904    | 2  | 45141180  | -0.024796 | 0.003535 | 2.32E-12  | T | C | 0.589 | 93.46  |
| Alcohol Use Disorder | rs1402398   | 2  | 58042241  | 0.020785  | 0.003499 | 2.85E-09  | A | G | 0.628 | 63.39  |
| Alcohol Use Disorder | rs13411140  | 2  | 144215811 | -0.019358 | 0.003495 | 3.03E-08  | T | C | 0.363 | 54.4   |
| Alcohol Use Disorder | rs2713557   | 2  | 227171603 | 0.019781  | 0.00352  | 1.92E-08  | T | C | 0.356 | 56.35  |
| Alcohol Use Disorder | rs13129401  | 4  | 39404872  | -0.023406 | 0.003416 | 7.33E-12  | A | G | 0.454 | 85.28  |
| Alcohol Use Disorder | rs1229984   | 4  | 100239319 | -0.223527 | 0.01016  | 2.88E-107 | T | C | 0.03  | 921.56 |
| Alcohol Use Disorder | rs13107325  | 4  | 103188709 | -0.056092 | 0.006328 | 7.71E-19  | T | C | 0.079 | 144.14 |



|                         |            |    |           |           |          |           |   |   |       |        |
|-------------------------|------------|----|-----------|-----------|----------|-----------|---|---|-------|--------|
| Alcohol Use Disorder    | rs12192123 | 6  | 31459342  | -0.02216  | 0.003962 | 2.23E-08  | A | G | 0.232 | 54.97  |
| Alcohol Use Disorder    | rs10270358 | 7  | 114948351 | 0.021961  | 0.003636 | 1.55E-09  | A | G | 0.318 | 65.71  |
| Alcohol Use Disorder    | rs4240624  | 8  | 9184231   | 0.026018  | 0.00447  | 5.88E-09  | A | G | 0.913 | 33.87  |
| Alcohol Use Disorder    | rs7073987  | 10 | 110565868 | -0.022452 | 0.003877 | 7.01E-09  | T | C | 0.259 | 60.72  |
| Alcohol Use Disorder    | rs7117878  | 11 | 57421457  | 0.021106  | 0.003662 | 8.26E-09  | A | C | 0.316 | 60.5   |
| Alcohol Use Disorder    | rs6589386  | 11 | 113443753 | -0.023179 | 0.003381 | 7.08E-12  | T | C | 0.424 | 82.4   |
| Alcohol Use Disorder    | rs61974485 | 14 | 58765903  | 0.021868  | 0.003974 | 3.74E-08  | T | C | 0.266 | 58.67  |
| Alcohol Use Disorder    | rs8008020  | 14 | 104355883 | 0.019256  | 0.003419 | 1.78E-08  | T | C | 0.416 | 56.58  |
| Alcohol Use Disorder    | rs73403005 | 15 | 47645174  | -0.020087 | 0.003454 | 6.06E-09  | A | G | 0.841 | 33.81  |
| Alcohol Use Disorder    | rs9926289  | 16 | 53820503  | -0.024484 | 0.003413 | 7.28E-13  | A | G | 0.398 | 90.19  |
| Problematic Alcohol Use | rs6421482  | 1  | 66419905  | -0.016437 | 0.002603 | 2.70E-10  | A | G | 0.436 | 57.89  |
| Problematic Alcohol Use | rs1260326  | 2  | 27730940  | -0.024563 | 0.002642 | 1.45E-20  | T | C | 0.403 | 126.52 |
| Problematic Alcohol Use | rs494904   | 2  | 45141180  | -0.021371 | 0.002696 | 2.26E-15  | T | C | 0.596 | 95.81  |
| Problematic Alcohol Use | rs1402398  | 2  | 58042241  | 0.019088  | 0.002689 | 1.27E-12  | A | G | 0.627 | 74.21  |
| Problematic Alcohol Use | rs9679319  | 2  | 104134432 | -0.015647 | 0.002604 | 1.86E-09  | T | G | 0.48  | 53.24  |
| Problematic Alcohol Use | rs13382553 | 2  | 138264231 | -0.018415 | 0.003069 | 1.97E-09  | A | G | 0.766 | 52.95  |
| Problematic Alcohol Use | rs2673136  | 2  | 227164653 | -0.015802 | 0.002691 | 4.31E-09  | A | G | 0.639 | 50.2   |
| Problematic Alcohol Use | rs62250713 | 3  | 85513793  | 0.016267  | 0.002689 | 1.46E-09  | A | G | 0.368 | 53.62  |
| Problematic Alcohol Use | rs13129401 | 4  | 39404872  | -0.023316 | 0.002618 | 5.29E-19  | A | G | 0.453 | 117.39 |
| Problematic Alcohol Use | rs2602856  | 4  | 100029145 | -0.015678 | 0.002732 | 9.56E-09  | A | C | 0.661 | 47.99  |
| Problematic Alcohol Use | rs1229984  | 4  | 100239319 | -0.223527 | 0.01016  | 2.88E-107 | T | C | 0.03  | 1278.5 |
| Problematic Alcohol Use | rs13135092 | 4  | 103198082 | 0.056302  | 0.004823 | 1.75E-31  | A | G | 0.919 | 205.19 |
| Problematic Alcohol Use | rs2582405  | 8  | 57424874  | 0.017499  | 0.003043 | 8.86E-09  | T | C | 0.237 | 48.24  |
| Problematic Alcohol Use | rs7900002  | 10 | 72907951  | -0.014549 | 0.002644 | 3.74E-08  | T | G | 0.601 | 44.22  |
| Problematic Alcohol Use | rs56722963 | 10 | 110537834 | -0.019028 | 0.002985 | 1.85E-10  | T | C | 0.255 | 59.94  |
| Problematic Alcohol Use | rs576859   | 11 | 57480623  | 0.020327  | 0.003585 | 1.43E-08  | A | C | 0.327 | 79.25  |
| Problematic Alcohol Use | rs6589386  | 11 | 113443753 | -0.019549 | 0.002603 | 5.88E-14  | T | C | 0.432 | 81.72  |
| Problematic Alcohol Use | rs10790456 | 11 | 121624837 | 0.023175  | 0.004123 | 1.89E-08  | A | G | 0.78  | 80.3   |
| Problematic Alcohol Use | rs12296477 | 12 | 51903860  | 0.014307  | 0.002609 | 4.15E-08  | C | G | 0.547 | 44.19  |
| Problematic Alcohol Use | rs61974485 | 14 | 58765903  | 0.016631  | 0.00302  | 3.67E-08  | T | C | 0.265 | 46.89  |
| Problematic Alcohol Use | rs8008020  | 14 | 104355883 | 0.015959  | 0.002633 | 1.35E-09  | T | C | 0.418 | 53.96  |
| Problematic Alcohol Use | rs72768626 | 16 | 24693048  | 0.03219   | 0.005757 | 2.26E-08  | A | G | 0.945 | 47.08  |

|                         |           |    |          |           |          |          |   |   |       |       |
|-------------------------|-----------|----|----------|-----------|----------|----------|---|---|-------|-------|
| Problematic Alcohol Use | rs9937709 | 16 | 53820813 | 0.017382  | 0.002633 | 4.06E-11 | A | G | 0.585 | 63.9  |
| Problematic Alcohol Use | rs492602  | 19 | 49206417 | -0.015998 | 0.002604 | 8.08E-10 | A | G | 0.508 | 55.73 |

**Table S5. Results of the MR-PRESSO analysis.**

| <b>Phenotype</b> | <b>No. of SNP</b> | <b>Outlier</b> | <b>Global test.<br/>P value</b> | <b>Distortion test.<br/>P value</b> | <b>MR analysis</b> | <b>Beta</b> | <b>SE</b> | <b>P Value</b> |
|------------------|-------------------|----------------|---------------------------------|-------------------------------------|--------------------|-------------|-----------|----------------|
| Drinks per week  | 84                | 1              | 5.00E-04                        | 0.716                               | Raw                | 0.581       | 0.192     | 0.003          |
|                  |                   |                |                                 |                                     | Outlier-corrected  | 0.656       | 0.177     | 3.90E-04       |
| AUD              | 18                | 0              | 0.141                           | 0.079                               | Raw                | 0.284       | 0.169     | 0.111          |
|                  |                   |                |                                 |                                     | Outlier-corrected  | -           | -         | -              |
| PAU              | 24                | 1              | 0.002                           | 0.568                               | Raw                | 0.424       | 0.206     | 0.052          |
|                  |                   |                |                                 |                                     | Outlier-corrected  | 0.336       | 0.177     | 0.071          |

**Table S6. Genetic instruments associated with potential confounders in PhenoScanner. (European ancestry,  $P < 5 \times 10^{-8}$ )**

| Phenotype       | SNP        | Chr | Pos       | A1 | A2 | Trait                                                       | Study   | Beta      | SE       | P        | N      | Unit      |
|-----------------|------------|-----|-----------|----|----|-------------------------------------------------------------|---------|-----------|----------|----------|--------|-----------|
| Drinks per week | rs58107686 | 1   | 33837334  | A  | C  | Hip circumference                                           | Neale B | -0.01647  | 0.00256  | 1.24E-10 | 336601 | IVNT      |
| Drinks per week | rs58107686 | 1   | 33837334  | A  | C  | Weight                                                      | Neale B | -0.01794  | 0.002259 | 1.95E-15 | 336227 | IVNT      |
| Drinks per week | rs823114   | 1   | 205719532 | A  | G  | Weight                                                      | Neale B | -0.01249  | 0.002129 | 4.47E-09 | 336227 | IVNT      |
| Drinks per week | rs77165542 | 2   | 430975    | C  | T  | Body mass index                                             | Neale B | 0.09532   | 0.00657  | 1.12E-47 | 336107 | IVNT      |
| Drinks per week | rs77165542 | 2   | 430975    | C  | T  | Hip circumference                                           | Neale B | 0.08644   | 0.006579 | 2.03E-39 | 336601 | IVNT      |
| Drinks per week | rs77165542 | 2   | 430975    | C  | T  | Waist circumference                                         | Neale B | 0.07051   | 0.005884 | 4.45E-33 | 336639 | IVNT      |
| Drinks per week | rs77165542 | 2   | 430975    | C  | T  | Weight                                                      | Neale B | 0.08737   | 0.005804 | 3.37E-51 | 336227 | IVNT      |
| Drinks per week | rs1260326  | 2   | 27730940  | C  | T  | Inflammatory bowel disease                                  | IBDGC   | -0.07711  | 0.009964 | 1.00E-14 | -      | log OR    |
| Drinks per week | rs1260326  | 2   | 27730940  | C  | T  | Weight                                                      | Neale B | 0.01778   | 0.00217  | 2.53E-16 | 336227 | IVNT      |
| Drinks per week | rs13383034 | 2   | 45155276  | C  | T  | Ever smoked                                                 | Neale B | -0.007121 | 0.001293 | 3.67E-08 | 336067 | risk diff |
| Drinks per week | rs13024996 | 2   | 144225215 | A  | C  | Years of educational attainment                             | SSGAC   | 0.018     | 0.003    | 1.85E-12 | 328917 | years     |
| Drinks per week | rs62250685 | 3   | 85457240  | A  | G  | Ever smoked                                                 | Neale B | 0.0091    | 0.001225 | 1.10E-13 | 336067 | risk diff |
| Drinks per week | rs62250685 | 3   | 85457240  | A  | G  | Past tobacco smoking                                        | Neale B | -0.02674  | 0.003263 | 2.48E-16 | 310749 | -         |
| Drinks per week | rs62250685 | 3   | 85457240  | A  | G  | Smoking status: previous                                    | Neale B | 0.008552  | 0.001198 | 9.57E-13 | 336024 | risk diff |
| Drinks per week | rs62250685 | 3   | 85457240  | A  | G  | Body mass index                                             | Neale B | 0.01651   | 0.002476 | 2.60E-11 | 336107 | IVNT      |
| Drinks per week | rs62250685 | 3   | 85457240  | A  | G  | Types of physical activity in last 4 weeks: other exercises | Neale B | 0.00704   | 0.001257 | 2.16E-08 | 335599 | risk diff |
| Drinks per week | rs62250685 | 3   | 85457240  | A  | G  | Weight                                                      | Neale B | 0.01583   | 0.002187 | 4.51E-13 | 336227 | IVNT      |
| Drinks per week | rs13066454 | 3   | 93994255  | C  | T  | Body mass index                                             | Neale B | 0.01995   | 0.002455 | 4.36E-16 | 336107 | IVNT      |
| Drinks per week | rs13066454 | 3   | 93994255  | C  | T  | Hip circumference                                           | Neale B | 0.01392   | 0.002458 | 1.49E-08 | 336601 | IVNT      |
| Drinks per week | rs13066454 | 3   | 93994255  | C  | T  | Waist circumference                                         | Neale B | 0.01559   | 0.002198 | 1.32E-12 | 336639 | IVNT      |
| Drinks per week | rs13066454 | 3   | 93994255  | C  | T  | Weight                                                      | Neale B | 0.01474   | 0.002168 | 1.06E-11 | 336227 | IVNT      |
| Drinks per week | rs9838144  | 3   | 131576287 | C  | G  | Body mass index                                             | Neale B | 0.0189    | 0.002974 | 2.08E-10 | 336107 | IVNT      |
| Drinks per week | rs9838144  | 3   | 131576287 | C  | G  | Waist circumference                                         | Neale B | 0.01519   | 0.002662 | 1.15E-08 | 336639 | IVNT      |
| Drinks per week | rs9838144  | 3   | 131576287 | C  | G  | Weight                                                      | Neale B | 0.01647   | 0.002627 | 3.58E-10 | 336227 | IVNT      |
| Drinks per week | rs2011092  | 3   | 141124607 | T  | C  | Hip circumference                                           | GIANT   | -0.031    | 0.0046   | 2.50E-11 | 145362 | IVNT      |
| Drinks per week | rs2011092  | 3   | 141124607 | T  | C  | Weight                                                      | GIANT   | -0.03311  | 0.00466  | 1.22E-12 | 125914 | IVNT      |
| Drinks per week | rs2011092  | 3   | 141124607 | T  | C  | Hip circumference                                           | Neale B | -0.02503  | 0.002529 | 4.40E-23 | 336601 | IVNT      |
| Drinks per week | rs2011092  | 3   | 141124607 | T  | C  | Waist circumference                                         | Neale B | -0.0141   | 0.002262 | 4.57E-10 | 336639 | IVNT      |

|                 |            |   |           |   |   |                                                                               |              |          |          |          |        |                |
|-----------------|------------|---|-----------|---|---|-------------------------------------------------------------------------------|--------------|----------|----------|----------|--------|----------------|
| Drinks per week | rs2011092  | 3 | 141124607 | T | C | Weight                                                                        | Neale B      | -0.03049 | 0.002231 | 1.65E-42 | 336227 | IVNT           |
| Drinks per week | rs13107325 | 4 | 103188709 | T | C | Body mass index                                                               | GIANT        | 0.058    | 0.009899 | 4.66E-09 | 126058 | IVNT           |
| Drinks per week | rs13107325 | 4 | 103188709 | T | C | Body mass index                                                               | GIANT        | 0.0477   | 0.0068   | 1.83E-12 | 321461 | IVNT           |
| Drinks per week | rs13107325 | 4 | 103188709 | T | C | Body mass index in physically active individuals                              | GIANT        | 0.0531   | 0.0088   | 1.46E-09 | 132755 | IVNT           |
| Drinks per week | rs13107325 | 4 | 103188709 | T | C | Body mass index in males greater than 50 years of age                         | GIANT        | 0.065    | 0.011    | 2.60E-09 | 90992  | IVNT           |
| Drinks per week | rs13107325 | 4 | 103188709 | T | C | Body mass index adjusted for physical activity                                | GIANT        | 0.0505   | 0.0079   | 2.00E-10 | 173078 | IVNT           |
| Drinks per week | rs13107325 | 4 | 103188709 | T | C | Body mass index adjusted for smoking                                          | GIANT        | 0.0497   | 0.0077   | 8.98E-11 | 181290 | IVNT           |
| Drinks per week | rs13107325 | 4 | 103188709 | T | C | Body mass index                                                               | GIANT        | 0.055    | 0.0044   | 2.80E-35 | 449889 | IVNT           |
| Drinks per week | rs13107325 | 4 | 103188709 | T | C | Body mass index                                                               | Speliotes EK | NA       | NA       | 1.50E-13 | 123865 | -              |
| Drinks per week | rs13107325 | 4 | 103188709 | T | C | Body mass index                                                               | Speliotes EK | 0.19     | 0.02585  | 2.00E-13 | -      | kg/m2 increase |
| Drinks per week | rs13107325 | 4 | 103188709 | T | C | Body mass index                                                               | GIANT        | 0.0741   | 0.01191  | 5.00E-10 | -      | kg/m           |
| Drinks per week | rs13107325 | 4 | 103188709 | T | C | Crohns disease                                                                | IBDGC        | 0.2216   | 0.0397   | 2.40E-08 | 20883  | log OR         |
| Drinks per week | rs13107325 | 4 | 103188709 | T | C | BMI adjusted for smoking behaviour                                            | GIANT        | 0.0469   | 0.007446 | 3.00E-10 | -      | kg/m           |
| Drinks per week | rs13107325 | 4 | 103188709 | T | C | BMI adjusted for smoking behaviour                                            | GIANT        | 0.0607   | 0.01032  | 4.00E-09 | -      | kg/m           |
| Drinks per week | rs13107325 | 4 | 103188709 | T | C | Body mass index                                                               | GIANT        | 0.0488   | 0.007748 | 3.00E-10 | -      | kg/m           |
| Drinks per week | rs13107325 | 4 | 103188709 | T | C | Body mass index                                                               | GIANT        | 0.0698   | 0.01142  | 1.00E-09 | -      | kg/m           |
| Drinks per week | rs13107325 | 4 | 103188709 | T | C | Body mass index                                                               | GIANT        | 0.0505   | 0.007939 | 2.00E-10 | -      | kg/m           |
| Drinks per week | rs13107325 | 4 | 103188709 | T | C | Body mass index                                                               | Neale B      | 0.0523   | 0.004572 | 2.66E-30 | 336107 | IVNT           |
| Drinks per week | rs13107325 | 4 | 103188709 | T | C | Hip circumference                                                             | Neale B      | 0.04256  | 0.004578 | 1.45E-20 | 336601 | IVNT           |
| Drinks per week | rs13107325 | 4 | 103188709 | T | C | Body mass index in physically active individuals                              | GIANT        | 0.0508   | 0.008633 | 4.00E-09 | -      | kg/m           |
| Drinks per week | rs13107325 | 4 | 103188709 | T | C | Body mass index in physically active individuals                              | GIANT        | 0.0531   | 0.008692 | 1.00E-09 | -      | kg/m           |
| Drinks per week | rs13107325 | 4 | 103188709 | T | C | Body mass index joint analysis main effects and physical activity interaction | GIANT        | NA       | NA       | 2.00E-09 | -      | -              |
| Drinks per week | rs13107325 | 4 | 103188709 | T | C | Body mass index joint analysis main effects and physical activity interaction | GIANT        | NA       | NA       | 2.00E-10 | -      | -              |
| Drinks per week | rs13107325 | 4 | 103188709 | T | C | Body mass index joint analysis main effects and physical activity interaction | GIANT        | NA       | NA       | 2.00E-08 | -      | -              |
| Drinks per week | rs13107325 | 4 | 103188709 | T | C | Body mass index joint analysis main effects and physical activity interaction | GIANT        | NA       | NA       | 8.00E-10 | -      | -              |
| Drinks per week | rs13107325 | 4 | 103188709 | T | C | Body mass index joint analysis main effects and smoking interaction           | GIANT        | NA       | NA       | 2.00E-10 | -      | -              |

|                 |            |    |           |   |   |                                                                     |              |          |           |          |        |           |
|-----------------|------------|----|-----------|---|---|---------------------------------------------------------------------|--------------|----------|-----------|----------|--------|-----------|
| Drinks per week | rs13107325 | 4  | 103188709 | T | C | Body mass index joint analysis main effects and smoking interaction | GIANT        | NA       | NA        | 1.00E-08 | -      | -         |
| Drinks per week | rs13107325 | 4  | 103188709 | T | C | Types of physical activity in last 4 weeks: strenuous sports        | Neale B      | -0.00829 | 0.001406  | 3.73E-09 | 335599 | risk diff |
| Drinks per week | rs13107325 | 4  | 103188709 | T | C | Waist circumference                                                 | Neale B      | 0.02421  | 0.004094  | 3.36E-09 | 336639 | IVNT      |
| Drinks per week | rs13107325 | 4  | 103188709 | T | C | Weight                                                              | Neale B      | 0.02814  | 0.004039  | 3.24E-12 | 336227 | IVNT      |
| Drinks per week | rs13107325 | 4  | 103188709 | T | C | Body mass index                                                     | Speliotes EK | NA       | NA        | 2.00E-13 | -      | -         |
| Drinks per week | rs28601761 | 8  | 126500031 | C | G | Treatment with aspirin                                              | Neale B      | 0.004867 | 0.0008424 | 7.56E-09 | 337159 | risk diff |
| Drinks per week | rs28601761 | 8  | 126500031 | C | G | Hip circumference                                                   | Neale B      | -0.01941 | 0.002465  | 3.39E-15 | 336601 | IVNT      |
| Drinks per week | rs28601761 | 8  | 126500031 | C | G | Weight                                                              | Neale B      | -0.01796 | 0.002175  | 1.49E-16 | 336227 | IVNT      |
| Drinks per week | rs7950166  | 11 | 8642218   | C | T | Body mass index                                                     | Neale B      | -0.01715 | 0.00251   | 8.25E-12 | 336107 | IVNT      |
| Drinks per week | rs7950166  | 11 | 8642218   | C | T | Waist circumference                                                 | Neale B      | -0.01377 | 0.002247  | 8.97E-10 | 336639 | IVNT      |
| Drinks per week | rs7950166  | 11 | 8642218   | C | T | Weight                                                              | Neale B      | -0.01443 | 0.002217  | 7.70E-11 | 336227 | IVNT      |
| Drinks per week | rs11030084 | 11 | 27643725  | T | C | Body mass index in females greater than 50 years of age             | GIANT        | -0.042   | 0.0067    | 2.80E-10 | 88424  | IVNT      |
| Drinks per week | rs11030084 | 11 | 27643725  | T | C | Body mass index                                                     | Speliotes EK | NA       | NA        | 7.37E-12 | 123865 | IVNT      |
| Drinks per week | rs11030084 | 11 | 27643725  | T | C | Body mass index                                                     | GIANT        | -0.04248 | 0.005689  | 8.21E-14 | 126576 | IVNT      |
| Drinks per week | rs11030084 | 11 | 27643725  | T | C | Body mass index                                                     | GIANT        | -0.0419  | 0.0048    | 2.57E-18 | 233665 | IVNT      |
| Drinks per week | rs11030084 | 11 | 27643725  | T | C | Hip circumference                                                   | GIANT        | -0.032   | 0.0057    | 2.00E-08 | 145105 | IVNT      |
| Drinks per week | rs11030084 | 11 | 27643725  | T | C | Obesity class 1                                                     | GIANT        | -0.099   | 0.016     | 1.00E-09 | 96739  | log OR    |
| Drinks per week | rs11030084 | 11 | 27643725  | T | C | Overweight                                                          | GIANT        | -0.078   | 0.012     | 1.80E-11 | 157563 | log OR    |
| Drinks per week | rs11030084 | 11 | 27643725  | T | C | Waist circumference                                                 | GIANT        | -0.034   | 0.0055    | 1.00E-09 | 153605 | IVNT      |
| Drinks per week | rs11030084 | 11 | 27643725  | T | C | Weight                                                              | GIANT        | -0.03556 | 0.00576   | 6.71E-10 | 125943 | IVNT      |
| Drinks per week | rs11030084 | 11 | 27643725  | T | C | Body mass index                                                     | Speliotes EK | NA       | NA        | 7.37E-12 | 123865 | -         |
| Drinks per week | rs11030084 | 11 | 27643725  | T | C | Body mass index                                                     | Neale B      | -0.0384  | 0.003079  | 1.05E-35 | 336107 | IVNT      |
| Drinks per week | rs11030084 | 11 | 27643725  | T | C | Hip circumference                                                   | Neale B      | -0.03276 | 0.003082  | 2.20E-26 | 336601 | IVNT      |
| Drinks per week | rs11030084 | 11 | 27643725  | T | C | Waist circumference                                                 | Neale B      | -0.02778 | 0.002757  | 6.93E-24 | 336639 | IVNT      |
| Drinks per week | rs11030084 | 11 | 27643725  | T | C | Weight                                                              | Neale B      | -0.02984 | 0.002719  | 5.11E-28 | 336227 | IVNT      |
| Drinks per week | rs11030084 | 11 | 27643725  | T | C | Body mass index in males greater than 50 years of age               | GIANT        | -0.049   | 0.007     | 5.00E-12 | 73864  | IVNT      |
| Drinks per week | rs11030084 | 11 | 27643725  | T | C | Body mass index in non-smokers                                      | GIANT        | -0.0383  | 0.0056    | 1.15E-11 | 129008 | IVNT      |
| Drinks per week | rs11030084 | 11 | 27643725  | T | C | Body mass index adjusted for physical activity                      | GIANT        | -0.0372  | 0.0054    | 5.77E-12 | 141741 | IVNT      |
| Drinks per week | rs11030084 | 11 | 27643725  | T | C | Body mass index adjusted for smoking                                | GIANT        | -0.038   | 0.0049    | 1.57E-14 | 163829 | IVNT      |

|                      |             |    |           |   |   |                                                       |              |           |          |           |        |           |
|----------------------|-------------|----|-----------|---|---|-------------------------------------------------------|--------------|-----------|----------|-----------|--------|-----------|
| Drinks per week      | rs11030084  | 11 | 27643725  | T | C | Past tobacco smoking                                  | Neale B      | 0.02439   | 0.004056 | 1.83E-09  | 310749 | -         |
| Drinks per week      | rs56030824  | 11 | 47397353  | A | G | Body mass index                                       | Neale B      | 0.02307   | 0.002573 | 3.10E-19  | 336107 | IVNT      |
| Drinks per week      | rs56030824  | 11 | 47397353  | A | G | Hip circumference                                     | Neale B      | 0.01721   | 0.002576 | 2.37E-11  | 336601 | IVNT      |
| Drinks per week      | rs56030824  | 11 | 47397353  | A | G | Waist circumference                                   | Neale B      | 0.01575   | 0.002303 | 7.98E-12  | 336639 | IVNT      |
| Drinks per week      | rs2764771   | 16 | 20013793  | A | G | Weight                                                | Neale B      | 0.01442   | 0.00232  | 5.12E-10  | 336227 | IVNT      |
| Drinks per week      | rs378421    | 16 | 28754684  | G | A | Body mass index                                       | Neale B      | -0.02632  | 0.002451 | 6.75E-27  | 336107 | IVNT      |
| Drinks per week      | rs378421    | 16 | 28754684  | G | A | Hip circumference                                     | Neale B      | -0.03136  | 0.002453 | 2.08E-37  | 336601 | IVNT      |
| Drinks per week      | rs378421    | 16 | 28754684  | G | A | Types of physical activity in last 4 weeks: light diy | Neale B      | 0.009088  | 0.00124  | 2.32E-13  | 335599 | risk diff |
| Drinks per week      | rs378421    | 16 | 28754684  | G | A | Waist circumference                                   | Neale B      | -0.02549  | 0.002194 | 3.41E-31  | 336639 | IVNT      |
| Drinks per week      | rs378421    | 16 | 28754684  | G | A | Weight                                                | Neale B      | -0.02659  | 0.002165 | 1.17E-34  | 336227 | IVNT      |
| Drinks per week      | rs378421    | 16 | 28754684  | G | A | Crohns disease                                        | IBDGC        | -0.1489   | 0.0254   | 4.67E-09  | 20883  | log OR    |
| Drinks per week      | rs113443718 | 16 | 29892184  | A | G | Weight                                                | Neale B      | 0.01567   | 0.002299 | 9.19E-12  | 336227 | IVNT      |
| Drinks per week      | rs4548913   | 17 | 2209888   | A | G | Body mass index                                       | Neale B      | -0.01375  | 0.002511 | 4.34E-08  | 336107 | IVNT      |
| Drinks per week      | rs2854334   | 17 | 29715500  | A | G | Hip circumference                                     | Neale B      | 0.01641   | 0.002483 | 3.89E-11  | 336601 | IVNT      |
| Drinks per week      | rs2854334   | 17 | 29715500  | A | G | Weight                                                | Neale B      | 0.01321   | 0.002191 | 1.66E-09  | 336227 | IVNT      |
| Drinks per week      | rs281379    | 19 | 49214274  | A | G | Crohns disease                                        | Franke A     | NA        | NA       | 7.40E-12  | 21389  | -         |
| Drinks per week      | rs281379    | 19 | 49214274  | A | G | Crohns disease                                        | Anderson CA  | NA        | NA       | 8.60E-10  | 26405  | -         |
| Drinks per week      | rs281379    | 19 | 49214274  | A | G | Psoriasis and Crohns disease combined                 | Ellinghaus D | NA        | NA       | 1.32E-17  | 15131  | -         |
| Drinks per week      | rs281379    | 19 | 49214274  | A | G | Crohns disease                                        | IBDGC        | NA        | NA       | 8.60E-10  | 14342  | log OR    |
| Drinks per week      | rs281379    | 19 | 49214274  | A | G | Crohns disease                                        | IBDGC        | 0.1398    | 0.0238   | 4.26E-09  | 20883  | log OR    |
| Drinks per week      | rs281379    | 19 | 49214274  | A | G | Crohns disease                                        | Franke A     | 0.06766   | 0.009866 | 7.00E-12  | -      | log OR    |
| Alcohol use disorder | rs494904    | 2  | 44914041  | C | T | Ever smoked                                           | Neale B      | 0.006818  | 0.001221 | 2.368E-08 | 336067 | risk diff |
| Alcohol use disorder | rs494904    | 2  | 44914041  | C | T | Past tobacco smoking                                  | Neale B      | -0.0187   | 0.003254 | 9.124E-09 | 310749 | -         |
| Alcohol use disorder | rs13411140  | 2  | 143458242 | C | T | Qualifications: A levels or as levels or equivalent   | Neale B      | -0.007149 | 0.001129 | 2.422E-10 | 334070 | risk diff |
| Alcohol use disorder | rs13411140  | 2  | 143458242 | C | T | Qualifications: college or university degree          | Neale B      | -0.008655 | 0.001178 | 2.018E-13 | 334070 | risk diff |
| Alcohol use disorder | rs13411140  | 2  | 143458242 | C | T | Qualifications: none                                  | Neale B      | 0.006449  | 0.000955 | 1.445E-11 | 334070 | risk diff |
| Alcohol use disorder | rs13411140  | 2  | 143458242 | C | T | Years of educational attainment                       | SSGAC        | -0.018    | 0.003    | 1.541E-12 | 328917 | years     |
| Alcohol Use Disorder | rs13107325  | 4  | 102267552 | T | C | Body mass index in physically active individuals      | GIANT        | 0.0531    | 0.0088   | 1.46E-09  | 132755 | IVNT      |
| Alcohol Use Disorder | rs13107325  | 4  | 102267552 | T | C | Body mass index in males greater than 50 years of age | GIANT        | 0.065     | 0.011    | 2.6E-09   | 90992  | IVNT      |
| Alcohol Use Disorder | rs13107325  | 4  | 102267552 | T | C | Body mass index adjusted for physical activity        | GIANT        | 0.0505    | 0.0079   | 2E-10     | 173078 | IVNT      |
| Alcohol use disorder | rs13107325  | 4  | 102267552 | T | C | Body mass index adjusted for smoking                  | GIANT        | 0.0497    | 0.0077   | 8.982E-11 | 181290 | IVNT      |
| Alcohol use disorder | rs13107325  | 4  | 102267552 | T | C | Body mass index                                       | GIANT        | 0.058     | 0.009899 | 4.66E-09  | 126058 | IVNT      |

|                      |            |   |           |   |   |                                                                               |              |          |          |            |        |                |
|----------------------|------------|---|-----------|---|---|-------------------------------------------------------------------------------|--------------|----------|----------|------------|--------|----------------|
| Alcohol use disorder | rs13107325 | 4 | 102267552 | T | C | Body mass index                                                               | GIANT        | 0.0477   | 0.0068   | 1.825E-12  | 321461 | IVNT           |
| Alcohol use disorder | rs13107325 | 4 | 102267552 | T | C | Body mass index                                                               | GIANT        | 0.055    | 0.0044   | 2.8E-35    | 449889 | IVNT           |
| Alcohol use disorder | rs13107325 | 4 | 102267552 | T | C | Body mass index                                                               | Speliotes EK | NA       | NA       | 1.5E-13    | 123865 | -              |
| Alcohol use disorder | rs13107325 | 4 | 102267552 | T | C | Crohns disease                                                                | IBDGC        | 0.2216   | 0.0397   | 2.4E-08    | 20883  | log OR         |
| Alcohol use disorder | rs13107325 | 4 | 102267552 | T | C | BMI adjusted for smoking behaviour                                            | GIANT        | 0.0469   | 0.007446 | 3E-10      | -      | kg/m           |
| Alcohol use disorder | rs13107325 | 4 | 102267552 | T | C | BMI adjusted for smoking behaviour                                            | GIANT        | 0.0607   | 0.01032  | 4E-09      | -      | kg/m           |
| Alcohol use disorder | rs13107325 | 4 | 102267552 | T | C | Body mass index                                                               | Speliotes EK | 0.19     | 0.02585  | 2E-13      | -      | kg/m2 increase |
| Alcohol use disorder | rs13107325 | 4 | 102267552 | T | C | Body mass index                                                               | GIANT        | 0.0741   | 0.01191  | 5E-10      | -      | kg/m           |
| Alcohol use disorder | rs13107325 | 4 | 102267552 | T | C | Body mass index                                                               | GIANT        | 0.0488   | 0.007748 | 3E-10      | -      | kg/m           |
| Alcohol use disorder | rs13107325 | 4 | 102267552 | T | C | Body mass index                                                               | GIANT        | 0.0698   | 0.01142  | 1E-09      | -      | kg/m           |
| Alcohol use disorder | rs13107325 | 4 | 102267552 | T | C | Body mass index                                                               | GIANT        | 0.0505   | 0.007939 | 2E-10      | -      | kg/m           |
| Alcohol use disorder | rs13107325 | 4 | 102267552 | T | C | Body mass index in physically active individuals                              | GIANT        | 0.0508   | 0.008633 | 4E-09      | -      | kg/m           |
| Alcohol use disorder | rs13107325 | 4 | 102267552 | T | C | Body mass index in physically active individuals                              | GIANT        | 0.0531   | 0.008692 | 1E-09      | -      | kg/m           |
| Alcohol use disorder | rs13107325 | 4 | 102267552 | T | C | Body mass index joint analysis main effects and physical activity interaction | GIANT        | NA       | NA       | 2E-09      | -      | -              |
| Alcohol use disorder | rs13107325 | 4 | 102267552 | T | C | Body mass index joint analysis main effects and physical activity interaction | GIANT        | NA       | NA       | 2E-10      | -      | -              |
| Alcohol use disorder | rs13107325 | 4 | 102267552 | T | C | Body mass index joint analysis main effects and physical activity interaction | GIANT        | NA       | NA       | 0.00000002 | -      | -              |
| Alcohol use disorder | rs13107325 | 4 | 102267552 | T | C | Body mass index joint analysis main effects and physical activity interaction | GIANT        | NA       | NA       | 8E-10      | -      | -              |
| Alcohol use disorder | rs13107325 | 4 | 102267552 | T | C | Body mass index joint analysis main effects and smoking interaction           | GIANT        | NA       | NA       | 2E-10      | -      | -              |
| Alcohol use disorder | rs13107325 | 4 | 102267552 | T | C | Body mass index joint analysis main effects and smoking interaction           | GIANT        | NA       | NA       | 0.00000001 | -      | -              |
| Alcohol use disorder | rs13107325 | 4 | 102267552 | T | C | Body mass index                                                               | Neale B      | 0.0523   | 0.004572 | 2.662E-30  | 336107 | IVNT           |
| Alcohol use disorder | rs13107325 | 4 | 102267552 | T | C | Hip circumference                                                             | Neale B      | 0.04256  | 0.004578 | 1.449E-20  | 336601 | IVNT           |
| Alcohol use disorder | rs13107325 | 4 | 102267552 | T | C | Qualifications: college or university degree                                  | Neale B      | -0.01236 | 0.002169 | 1.194E-08  | 334070 | risk diff      |
| Alcohol use disorder | rs13107325 | 4 | 102267552 | T | C | Types of physical activity in last 4 weeks: strenuous sports                  | Neale B      | -0.00829 | 0.001406 | 3.727E-09  | 335599 | risk diff      |
| Alcohol use disorder | rs13107325 | 4 | 102267552 | T | C | Waist circumference                                                           | Neale B      | 0.02421  | 0.004094 | 3.355E-09  | 336639 | IVNT           |
| Alcohol use disorder | rs13107325 | 4 | 102267552 | T | C | Weight                                                                        | Neale B      | 0.02814  | 0.004039 | 3.241E-12  | 336227 | IVNT           |



|                         |            |    |           |   |   |                                                       |              |           |          |            |        |           |
|-------------------------|------------|----|-----------|---|---|-------------------------------------------------------|--------------|-----------|----------|------------|--------|-----------|
| Alcohol use disorder    | rs13107325 | 4  | 102267552 | T | C | Body mass index                                       | Speliotes EK | NA        | NA       | 2E-13      | -      | -         |
| Alcohol use disorder    | rs7117878  | 11 | 57653985  | A | C | Types of physical activity in last 4 weeks: heavy diy | Neale B      | -0.007368 | 0.001268 | 6.147E-09  | 335599 | risk diff |
| Alcohol use disorder    | rs9926289  | 16 | 53786591  | A | G | Body mass index                                       | GIANT        | 0.07703   | 0.01338  | 8.551E-09  | 13991  | IVNT      |
| Alcohol use disorder    | rs9926289  | 16 | 53786591  | A | G | Body mass index                                       | GIANT        | 0.0725    | 0.0052   | 6.44E-45   | 97745  | IVNT      |
| Alcohol use disorder    | rs9926289  | 16 | 53786591  | A | G | Hip circumference                                     | GIANT        | 0.064     | 0.0057   | 5.5E-29    | 74367  | IVNT      |
| Alcohol use disorder    | rs9926289  | 16 | 53786591  | A | G | Waist circumference                                   | GIANT        | 0.066     | 0.0054   | 4.5E-34    | 83784  | IVNT      |
| Alcohol use disorder    | rs9926289  | 16 | 53786591  | A | G | Waist hip ratio                                       | GIANT        | 0.037     | 0.0053   | 6.2E-12    | 73257  | IVNT      |
| Alcohol use disorder    | rs9926289  | 16 | 53786591  | A | G | Body mass index                                       | Neale B      | 0.07006   | 0.002457 | 1.186E-178 | 336107 | IVNT      |
| Alcohol use disorder    | rs9926289  | 16 | 53786591  | A | G | Hip circumference                                     | Neale B      | 0.05899   | 0.00246  | 6.197E-127 | 336601 | IVNT      |
| Alcohol use disorder    | rs9926289  | 16 | 53786591  | A | G | Waist circumference                                   | Neale B      | 0.05437   | 0.0022   | 1.108E-134 | 336639 | IVNT      |
| Alcohol use disorder    | rs9926289  | 16 | 53786591  | A | G | Weight                                                | Neale B      | 0.05811   | 0.00217  | 1.04E-157  | 336227 | IVNT      |
| Problematic alcohol use | rs6421482  | 1  | 65954222  | A | G | Body mass index                                       | Neale B      | -0.01376  | 0.002429 | 1.484E-08  | 336107 | IVNT      |
| Problematic alcohol use | rs6421482  | 1  | 65954222  | A | G | Hip circumference                                     | Neale B      | -0.0139   | 0.002431 | 1.098E-08  | 336601 | IVNT      |
| Problematic alcohol use | rs6421482  | 1  | 65954222  | A | G | Weight                                                | Neale B      | -0.01293  | 0.002145 | 1.667E-09  | 336227 | IVNT      |
| Problematic Alcohol use | rs1260326  | 2  | 27508073  | C | T | Inflammatory bowel disease                            | IBDGC        | -0.07711  | 0.009964 | 1E-14      | -      | log OR    |
| Problematic Alcohol use | rs1260326  | 2  | 27508073  | C | T | Weight                                                | Neale B      | 0.01778   | 0.00217  | 2.53E-16   | 336227 | IVNT      |
| Problematic alcohol use | rs494904   | 2  | 44914041  | C | T | Ever smoked                                           | Neale B      | 0.006818  | 0.001221 | 2.368E-08  | 336067 | risk diff |
| Problematic alcohol use | rs494904   | 2  | 44914041  | C | T | Past tobacco smoking                                  | Neale B      | -0.0187   | 0.003254 | 9.124E-09  | 310749 | -         |
| Problematic alcohol use | rs62250713 | 3  | 85464643  | A | G | Body mass index                                       | Neale B      | 0.01711   | 0.002501 | 7.786E-12  | 336107 | IVNT      |
| Problematic alcohol use | rs62250713 | 3  | 85464643  | A | G | Ever smoked                                           | Neale B      | 0.008865  | 0.001238 | 7.901E-13  | 336067 | risk diff |
| Problematic alcohol use | rs62250713 | 3  | 85464643  | A | G | Past tobacco smoking                                  | Neale B      | -0.02635  | 0.003296 | 1.315E-15  | 310749 | -         |
| Problematic alcohol use | rs62250713 | 3  | 85464643  | A | G | Smoking status: previous                              | Neale B      | 0.008495  | 0.001211 | 2.273E-12  | 336024 | risk diff |
| Problematic alcohol use | rs62250713 | 3  | 85464643  | A | G | Waist circumference                                   | Neale B      | 0.01252   | 0.002239 | 2.277E-08  | 336639 | IVNT      |
| Problematic alcohol use | rs62250713 | 3  | 85464643  | A | G | Weight                                                | Neale B      | 0.0162    | 0.002209 | 2.3E-13    | 336227 | IVNT      |
| Problematic Alcohol use | rs13135092 | 4  | 102276925 | A | G | Crohns disease                                        | IBDGC        | -0.2215   | 0.0389   | 1.21E-08   | 20883  | log OR    |
| Problematic alcohol use | rs13135092 | 4  | 102276925 | A | G | Body mass index                                       | Neale B      | -0.05005  | 0.004374 | 2.596E-30  | 336107 | IVNT      |
| Problematic alcohol use | rs13135092 | 4  | 102276925 | A | G | Hip circumference                                     | Neale B      | -0.04007  | 0.00438  | 5.809E-20  | 336601 | IVNT      |
| Problematic alcohol use | rs13135092 | 4  | 102276925 | A | G | Qualifications: college or university degree          | Neale B      | 0.01152   | 0.002075 | 2.82E-08   | 334070 | risk diff |
| Problematic alcohol use | rs13135092 | 4  | 102276925 | A | G | Waist circumference                                   | Neale B      | -0.02425  | 0.003918 | 6.013E-10  | 336639 | IVNT      |
| Problematic alcohol use | rs13135092 | 4  | 102276925 | A | G | Weight                                                | Neale B      | -0.02841  | 0.003864 | 1.955E-13  | 336227 | IVNT      |
| Problematic alcohol use | rs9937709  | 16 | 53786901  | A | G | Body mass index                                       | Neale B      | -0.0662   | 0.002438 | 3.422E-162 | 336107 | IVNT      |
| Problematic alcohol use | rs9937709  | 16 | 53786901  | A | G | Hip circumference                                     | Neale B      | -0.05597  | 0.002441 | 3.234E-116 | 336601 | IVNT      |

|                         |           |    |          |   |   |                     |         |          |          |            |        |        |
|-------------------------|-----------|----|----------|---|---|---------------------|---------|----------|----------|------------|--------|--------|
| Problematic alcohol use | rs9937709 | 16 | 53786901 | A | G | Waist circumference | Neale B | -0.05194 | 0.002183 | 5.686E-125 | 336639 | IVNT   |
| Problematic alcohol use | rs9937709 | 16 | 53786901 | A | G | Weight              | Neale B | -0.05521 | 0.002154 | 9.411E-145 | 336227 | IVNT   |
| Problematic alcohol use | rs492602  | 19 | 48703160 | G | A | Crohns disease      | IBDGC   | NA       | NA       | 2.1E-09    | 14342  | log OR |
| Problematic alcohol use | rs492602  | 19 | 48703160 | G | A | Crohns disease      | IBDGC   | 0.1353   | 0.0237   | 1.212E-08  | 20883  | log OR |

**Table S7. Alcohol consumption-related CpG sites and mQTLs from ARIES database.**

| CpG        | CpG.Chr | CpG.Pos   | EWAS.beta | EWAS.SE  | mQTL       | mQTL.Chr | mQTL.Pos  | Effect Allele | Other allele | MAF   | ARIES.beta | ARIES.SE   | Cis |
|------------|---------|-----------|-----------|----------|------------|----------|-----------|---------------|--------------|-------|------------|------------|-----|
| cg00546117 | 1       | 8445545   | -0.000208 | 3.86E-05 | rs2708630  | 1        | 8447404   | C             | T            | 0.33  | -0.74489   | 0.0268557  | Y   |
| cg07180646 | 1       | 15481541  | -0.000229 | 3.90E-05 | rs941456   | 1        | 15471731  | T             | C            | 0.053 | -0.7429    | 0.08248286 | Y   |
| cg04605617 | 1       | 20501558  | -0.00026  | 4.77E-05 | rs10916683 | 1        | 20300544  | G             | A            | 0.163 | -0.40198   | 0.05226425 | Y   |
| cg04605617 | 1       | 20501558  | -0.00026  | 4.77E-05 | rs2872909  | 1        | 20482701  | A             | G            | 0.187 | -0.56744   | 0.04640759 | Y   |
| cg03260624 | 1       | 91970722  | -0.000242 | 3.74E-05 | rs13447450 | 1        | 91965850  | T             | C            | 0.368 | 0.22058    | 0.02819487 | Y   |
| cg16246545 | 1       | 120255941 | -0.000606 | 8.57E-05 | rs11583993 | 1        | 120255370 | A             | G            | 0.092 | -0.75896   | 0.07416818 | Y   |
| cg19238380 | 1       | 156093948 | -0.000295 | 4.20E-05 | rs517606   | 1        | 156089324 | T             | G            | 0.043 | -0.86261   | 0.10918727 | Y   |
| cg00313914 | 1       | 201618901 | -0.000447 | 8.38E-05 | rs34569491 | 1        | 201501963 | T             | C            | 0.429 | 0.44233    | 0.04309944 | Y   |
| cg00313914 | 1       | 201618901 | -0.000447 | 8.38E-05 | rs7364578  | 1        | 201616627 | A             | G            | 0.267 | -0.59581   | 0.0471075  | Y   |
| cg23712594 | 1       | 226591890 | -0.000197 | 3.29E-05 | rs1433574  | 1        | 226609339 | C             | A            | 0.18  | 0.29472    | 0.03910761 | Y   |
| cg10456541 | 2       | 8721512   | -0.00019  | 3.43E-05 | rs59996641 | 2        | 8723959   | T             | A            | 0.271 | -0.26204   | 0.03735547 | Y   |
| cg14274621 | 2       | 8825107   | -0.000137 | 2.37E-05 | rs11894184 | 2        | 8825011   | C             | T            | 0.069 | 0.86828    | 0.07161226 | Y   |
| cg00883689 | 2       | 54802904  | -0.000285 | 4.09E-05 | rs4455200  | 2        | 54801591  | A             | T            | 0.258 | 0.6648     | 0.04324282 | Y   |
| cg20945261 | 3       | 13460618  | -0.000192 | 3.20E-05 | rs11924012 | 3        | 13484654  | C             | G            | 0.128 | 0.28742    | 0.04154741 | Y   |
| cg24642820 | 3       | 13462465  | -0.000302 | 5.27E-05 | rs7628923  | 3        | 13439005  | G             | A            | 0.122 | -0.44724   | 0.05376747 | Y   |
| cg18483487 | 3       | 45208900  | -0.000206 | 3.69E-05 | rs1010138  | 3        | 45220250  | A             | T            | 0.059 | 1.08612    | 0.08393762 | Y   |
| cg18483487 | 3       | 45208900  | -0.000206 | 3.69E-05 | rs62244501 | 3        | 45216595  | T             | C            | 0.177 | -0.54528   | 0.05174176 | Y   |
| cg18482892 | 3       | 56833426  | -0.000226 | 3.95E-05 | rs35983891 | 3        | 56831267  | T             | C            | 0.412 | -0.26371   | 0.03523302 | Y   |
| cg02578470 | 3       | 127320670 | -0.000238 | 3.96E-05 | rs2720262  | 3        | 127315788 | A             | C            | 0.423 | -0.30423   | 0.03584765 | Y   |
| cg02282631 | 5       | 42953543  | -0.000325 | 5.87E-05 | rs36122053 | 5        | 42954404  | A             | C            | 0.129 | -0.43384   | 0.06936645 | Y   |
| cg12807764 | 5       | 146864669 | -0.000257 | 4.39E-05 | rs7734086  | 5        | 146855963 | T             | C            | 0.488 | 0.36611    | 0.03283574 | Y   |
| cg12662084 | 6       | 17809126  | -0.000349 | 5.44E-05 | rs6509695  | 19       | 53339237  | C             | T            | 0.427 | 0.4727     | 0.03212545 | N   |
| cg17865955 | 6       | 33601177  | -0.000211 | 3.42E-05 | rs11760139 | 6        | 33587392  | T             | C            | 0.141 | -0.81382   | 0.06134898 | Y   |
| cg17865955 | 6       | 33601177  | -0.000211 | 3.42E-05 | rs28360584 | 6        | 33606524  | C             | G            | 0.142 | 0.66489    | 0.05955661 | Y   |
| cg17865955 | 6       | 33601177  | -0.000211 | 3.42E-05 | rs6926568  | 6        | 33597079  | T             | C            | 0.255 | -0.52372   | 0.04805339 | Y   |
| cg05593667 | 6       | 35490744  | -0.000252 | 3.09E-05 | rs7755718  | 6        | 35489971  | G             | A            | 0.054 | -1.14105   | 0.07687131 | Y   |
| cg26312998 | 6       | 43337775  | -0.000171 | 2.99E-05 | rs70953670 | 6        | 43264895  | A             | C            | 0.11  | 1.0844     | 0.05783217 | Y   |
| cg17390562 | 6       | 159238463 | -0.000141 | 2.33E-05 | rs9346767  | 6        | 159197371 | T             | C            | 0.494 | 0.33971    | 0.03356553 | Y   |

|            |    |           |           |          |            |    |           |   |   |       |          |            |   |
|------------|----|-----------|-----------|----------|------------|----|-----------|---|---|-------|----------|------------|---|
| cg22871253 | 6  | 159238744 | -0.000188 | 3.10E-05 | rs9456354  | 6  | 159248864 | C | G | 0.499 | 0.295    | 0.03638593 | Y |
| cg07512517 | 7  | 38408106  | -0.000171 | 3.07E-05 | rs12532845 | 7  | 38384841  | A | G | 0.241 | -0.34803 | 0.04534392 | Y |
| cg08597832 | 8  | 144416327 | -0.000162 | 2.48E-05 | rs2467943  | 8  | 144420030 | C | T | 0.092 | 0.61815  | 0.06950277 | Y |
| cg23629150 | 8  | 144416404 | -0.000241 | 4.27E-05 | rs2467933  | 8  | 144428185 | G | C | 0.092 | 0.86949  | 0.05679404 | Y |
| cg12188860 | 8  | 144416485 | -0.000239 | 4.12E-05 | rs2467936  | 8  | 144445222 | A | G | 0.1   | 0.99708  | 0.05643899 | Y |
| cg12188860 | 8  | 144416485 | -0.000239 | 4.12E-05 | rs34148379 | 8  | 144390502 | G | A | 0.466 | 0.42516  | 0.03845267 | Y |
| cg07104958 | 10 | 46168551  | -0.000263 | 4.51E-05 | rs4418752  | 10 | 46102971  | C | T | 0.034 | 1.20889  | 0.10972493 | Y |
| cg23444264 | 10 | 72219751  | -0.000193 | 3.38E-05 | rs1106887  | 10 | 72219918  | T | C | 0.378 | 0.26452  | 0.04277601 | Y |
| cg19939077 | 10 | 81108060  | -0.000226 | 3.38E-05 | rs2181080  | 10 | 81121960  | G | A | 0.463 | -0.39695 | 0.04253767 | Y |
| cg07091481 | 10 | 82169149  | -0.000194 | 3.16E-05 | rs6585994  | 10 | 82191643  | A | G | 0.482 | 0.219    | 0.03287311 | Y |
| cg03599037 | 10 | 82172508  | -0.000136 | 1.88E-05 | rs72819578 | 10 | 82225610  | T | C | 0.042 | 0.65418  | 0.09730029 | Y |
| cg00291478 | 10 | 121301041 | -0.000339 | 5.85E-05 | rs10787977 | 10 | 121298412 | T | C | 0.135 | -0.39786 | 0.05003131 | Y |
| cg20204986 | 11 | 32448067  | -0.000178 | 3.31E-05 | rs11824258 | 11 | 32442275  | G | A | 0.228 | 0.28932  | 0.0495338  | Y |
| cg12616487 | 11 | 62379063  | -0.000168 | 2.51E-05 | rs12808829 | 11 | 62378660  | A | G | 0.349 | -0.26998 | 0.0384346  | Y |
| cg10816169 | 11 | 66080868  | -0.000273 | 4.46E-05 | rs3741368  | 11 | 66083782  | A | G | 0.47  | 0.31731  | 0.0434482  | Y |
| cg03575969 | 11 | 72492171  | -0.00017  | 3.16E-05 | rs481206   | 11 | 72497462  | T | C | 0.344 | -0.27029 | 0.04089757 | Y |
| cg08115371 | 11 | 79115706  | -0.000394 | 6.52E-05 | rs7117144  | 11 | 78861603  | C | T | 0.047 | -0.69348 | 0.10011304 | Y |
| cg10045354 | 11 | 111169427 | -0.000219 | 4.00E-05 | rs11213823 | 11 | 111169990 | T | C | 0.287 | -0.25406 | 0.04496804 | Y |
| cg20374917 | 11 | 128603874 | -0.000163 | 2.45E-05 | rs607703   | 11 | 128604174 | T | C | 0.482 | -0.30737 | 0.03357885 | Y |
| cg27479634 | 12 | 54070545  | -0.000217 | 3.67E-05 | rs4759278  | 12 | 54055801  | C | T | 0.307 | -0.51257 | 0.04552172 | Y |
| cg24420742 | 12 | 77721808  | -0.000197 | 3.43E-05 | rs59836592 | 12 | 77671731  | C | G | 0.027 | -1.42902 | 0.12374171 | Y |
| cg18954900 | 12 | 96604497  | -0.000234 | 3.87E-05 | rs12299943 | 12 | 96611648  | G | A | 0.305 | 0.3219   | 0.04351735 | Y |
| cg01687189 | 12 | 102225365 | -0.000253 | 4.10E-05 | rs4237981  | 12 | 102225611 | A | T | 0.49  | -0.55921 | 0.0349073  | Y |
| cg23975840 | 12 | 117042895 | 0.0002678 | 4.21E-05 | rs7960700  | 12 | 117039310 | G | A | 0.19  | 0.36936  | 0.03830133 | Y |
| cg00986580 | 14 | 22951241  | -0.000245 | 4.14E-05 | rs227860   | 14 | 22950491  | A | T | 0.13  | 0.72755  | 0.05858494 | Y |
| cg03345232 | 14 | 92981121  | -0.000209 | 3.38E-05 | rs12884739 | 14 | 93019511  | A | G | 0.36  | -0.47758 | 0.04588934 | Y |
| cg03345232 | 14 | 92981121  | -0.000209 | 3.38E-05 | rs77826962 | 14 | 93006567  | G | A | 0.16  | 0.47557  | 0.06065487 | Y |
| cg18125510 | 14 | 100841768 | -0.000342 | 5.53E-05 | rs12891492 | 14 | 100843343 | G | A | 0.228 | -0.47942 | 0.04112782 | Y |
| cg26430287 | 15 | 67439567  | -0.000247 | 3.87E-05 | rs56118922 | 15 | 67407252  | G | A | 0.122 | -0.42369 | 0.05008855 | Y |
| cg26430287 | 15 | 67439567  | -0.000247 | 3.87E-05 | rs62006055 | 15 | 67439629  | G | A | 0.272 | 0.48045  | 0.0340427  | Y |
| cg07286682 | 15 | 69447132  | 0.0001971 | 3.53E-05 | rs62008108 | 15 | 69440889  | C | A | 0.42  | 0.36686  | 0.04286339 | Y |
| cg03603530 | 16 | 69365009  | -0.000109 | 1.93E-05 | rs1127231  | 16 | 69354963  | G | A | 0.312 | 0.57129  | 0.04416936 | Y |

|            |    |          |           |          |             |    |          |   |   |       |          |            |   |
|------------|----|----------|-----------|----------|-------------|----|----------|---|---|-------|----------|------------|---|
| cg14330293 | 17 | 1374051  | 0.0001286 | 2.25E-05 | rs4411554   | 17 | 1319765  | C | G | 0.296 | -0.23463 | 0.04053102 | Y |
| cg05465916 | 17 | 7819762  | -0.000191 | 3.19E-05 | rs138596240 | 17 | 7923609  | G | A | 0.018 | -1.18004 | 0.16394955 | Y |
| cg01735398 | 17 | 18907305 | -0.000228 | 4.25E-05 | rs73306439  | 17 | 18866861 | T | G | 0.039 | 0.87878  | 0.11468506 | Y |
| cg22332722 | 18 | 25754857 | -0.000361 | 6.46E-05 | rs1944288   | 18 | 25749095 | C | A | 0.246 | -0.33898 | 0.04744217 | Y |
| cg16705273 | 18 | 42262885 | -0.000251 | 3.47E-05 | rs12456054  | 18 | 42077425 | A | G | 0.127 | -0.457   | 0.06904304 | Y |
| cg16705273 | 18 | 42262885 | -0.000251 | 3.47E-05 | rs78646871  | 18 | 42262428 | G | A | 0.025 | -0.93993 | 0.1355022  | Y |
| cg15059065 | 19 | 17354961 | -0.000243 | 4.00E-05 | rs74182298  | 19 | 17346953 | G | A | 0.3   | -0.487   | 0.04651967 | Y |
| cg15059065 | 19 | 17354961 | -0.000243 | 4.00E-05 | rs891202    | 19 | 17338033 | T | C | 0.378 | 0.34603  | 0.04842574 | Y |
| cg22052056 | 20 | 31351813 | -0.00018  | 3.25E-05 | rs34467919  | 20 | 31272928 | T | C | 0.388 | -0.24386 | 0.03178505 | Y |
| cg14391586 | 20 | 62681296 | -0.000188 | 3.51E-05 | rs816943    | 20 | 62676009 | G | A | 0.48  | 0.57082  | 0.03924937 | Y |
| cg00549412 | 21 | 43933482 | -0.000191 | 3.40E-05 | rs6586324   | 21 | 43942135 | T | C | 0.49  | 0.33801  | 0.04040833 | Y |

**Table S8. Two-sample Mendelian Randomization estimates of methylation at alcohol consumption-related CpG sites on CRC risk.**

| <b>CpG site</b> | <b>Chr</b> | <b>Position</b> | <b>Nearest Gene(s)</b> | <b>Method</b> | <b>SNP</b> | <b>OR</b> | <b>LCI</b> | <b>UCI</b> | <b>P Value</b> |
|-----------------|------------|-----------------|------------------------|---------------|------------|-----------|------------|------------|----------------|
| cg00546117      | 1          | 8445545         | <i>RERE</i>            | Wald Ratio    | 1          | 1.02      | 0.98       | 1.07       | 0.238          |
| cg07180646      | 1          | 15481541        | <i>TMEM51</i>          | Wald Ratio    | 1          | 0.99      | 0.91       | 1.07       | 0.718          |
| cg04605617      | 1          | 20501558        | <i>PLA2G2C</i>         | IVW           | 2          | 0.99      | 0.93       | 1.04       | 0.635          |
| cg03260624      | 1          | 91970722        | <i>CDC7</i>            | Wald Ratio    | 1          | 1.04      | 0.91       | 1.19       | 0.549          |
| cg16246545      | 1          | 120255941       | <i>PHGDH</i>           | Wald Ratio    | 1          | 1.06      | 0.99       | 1.13       | 0.08           |
| cg19238380      | 1          | 156093948       | <i>LMNA</i>            | Wald Ratio    | 1          | 1.02      | 0.94       | 1.1        | 0.715          |
| cg00313914      | 1          | 201618901       | <i>NAV1</i>            | IVW           | 2          | 0.99      | 0.95       | 1.04       | 0.762          |
| cg23712594      | 1          | 226591890       | <i>PARP1</i>           | Wald Ratio    | 1          | 0.9       | 0.8        | 1.03       | 0.124          |
| cg14274621      | 2          | 8825107         | -                      | Wald Ratio    | 1          | 1         | 0.93       | 1.07       | 0.938          |
| cg00883689      | 2          | 54802904        | <i>SPTBN1</i>          | Wald Ratio    | 1          | 1.02      | 0.97       | 1.08       | 0.351          |
| cg20945261      | 3          | 13460618        | <i>NUP210</i>          | Wald Ratio    | 1          | 0.97      | 0.84       | 1.12       | 0.684          |
| cg24642820      | 3          | 13462465        | <i>NUP210</i>          | Wald Ratio    | 1          | 0.97      | 0.88       | 1.07       | 0.595          |
| cg18483487      | 3          | 45208900        | -                      | IVW           | 2          | 1.02      | 0.97       | 1.06       | 0.479          |
| cg18482892      | 3          | 56833426        | <i>ARHGEF3</i>         | Wald Ratio    | 1          | 0.92      | 0.82       | 1.03       | 0.141          |
| cg02578470      | 3          | 127320670       | <i>MCM2</i>            | Wald Ratio    | 1          | 0.98      | 0.89       | 1.08       | 0.659          |
| cg02282631      | 5          | 42953543        | -                      | Wald Ratio    | 1          | 0.96      | 0.87       | 1.06       | 0.467          |
| cg12807764      | 5          | 146864669       | <i>DPYSL3</i>          | Wald Ratio    | 1          | 1.02      | 0.94       | 1.1        | 0.65           |
| cg17865955      | 6          | 33601177        | <i>ITPR3</i>           | IVW           | 3          | 1.02      | 0.98       | 1.05       | 0.301          |
| cg07512517      | 7          | 38408106        | <i>TRG-ASI, TRGV1</i>  | Wald Ratio    | 1          | 0.94      | 0.86       | 1.04       | 0.243          |
| cg08597832      | 8          | 144416327       | <i>TOP1MT</i>          | Wald Ratio    | 1          | 1         | 0.92       | 1.09       | 0.974          |
| cg23629150      | 8          | 144416404       | <i>TOP1MT</i>          | Wald Ratio    | 1          | 1         | 0.94       | 1.07       | 0.965          |
| cg12188860      | 8          | 144416485       | <i>TOP1MT</i>          | IVW           | 2          | 1.02      | 0.97       | 1.07       | 0.41           |
| cg07104958      | 10         | 46168551        | <i>ZFAND4</i>          | Wald Ratio    | 1          | 0.99      | 0.92       | 1.05       | 0.652          |
| cg23444264      | 10         | 72219751        | -                      | Wald Ratio    | 1          | 1.11      | 0.93       | 1.34       | 0.249          |
| cg19939077      | 10         | 81108060        | <i>PPIF</i>            | Wald Ratio    | 1          | 0.93      | 0.87       | 1          | 0.053          |
| cg07091481      | 10         | 82169149        | <i>FAM213A</i>         | Wald Ratio    | 1          | 0.95      | 0.83       | 1.08       | 0.451          |
| cg03599037      | 10         | 82172508        | <i>FAM213A</i>         | Wald Ratio    | 1          | 0.98      | 0.87       | 1.11       | 0.782          |
| cg00291478      | 10         | 121301041       | <i>RGS10</i>           | Wald Ratio    | 1          | 1.04      | 0.94       | 1.16       | 0.448          |

|            |    |           |                                    |            |   |      |      |      |       |
|------------|----|-----------|------------------------------------|------------|---|------|------|------|-------|
| cg20204986 | 11 | 32448067  | <i>WT1</i>                         | Wald Ratio | 1 | 1.05 | 0.93 | 1.18 | 0.405 |
| cg12616487 | 11 | 62379063  | <i>ROM1, EML3</i>                  | Wald Ratio | 1 | 1.06 | 0.95 | 1.18 | 0.322 |
| cg10816169 | 11 | 66080868  | <i>RP11-867G23.13</i>              | Wald Ratio | 1 | 1.03 | 0.94 | 1.13 | 0.513 |
| cg08115371 | 11 | 79115706  | <i>ODZ4</i>                        | Wald Ratio | 1 | 0.95 | 0.87 | 1.05 | 0.333 |
| cg20374917 | 11 | 128603874 | <i>FLII</i>                        | Wald Ratio | 1 | 1.05 | 0.95 | 1.15 | 0.354 |
| cg27479634 | 12 | 54070545  | <i>ATP5G2</i>                      | Wald Ratio | 1 | 0.97 | 0.91 | 1.04 | 0.378 |
| cg24420742 | 12 | 77721808  | <i>NAV3</i>                        | Wald Ratio | 1 | 0.98 | 0.92 | 1.04 | 0.476 |
| cg18954900 | 12 | 96604497  | <i>ELK3</i>                        | Wald Ratio | 1 | 0.95 | 0.87 | 1.05 | 0.345 |
| cg01687189 | 12 | 102225365 | <i>GNPTAB</i>                      | Wald Ratio | 1 | 0.98 | 0.93 | 1.03 | 0.404 |
| cg23975840 | 12 | 117042895 | -                                  | Wald Ratio | 1 | 0.93 | 0.84 | 1.03 | 0.164 |
| cg00986580 | 14 | 22951241  | <i>TRAJ54, TRAJ53, AE000661.37</i> | Wald Ratio | 1 | 0.93 | 0.87 | 1    | 0.067 |
| cg03345232 | 14 | 92981121  | <i>RIN3</i>                        | IVW        | 2 | 0.97 | 0.92 | 1.02 | 0.255 |
| cg18125510 | 14 | 100841768 | <i>WARS, WDR25</i>                 | Wald Ratio | 1 | 1.03 | 0.96 | 1.11 | 0.354 |
| cg26430287 | 15 | 67439567  | <i>SMAD3, RP11-342M21.2</i>        | IVW        | 2 | 0.98 | 0.93 | 1.05 | 0.617 |
| cg07286682 | 15 | 69447132  | -                                  | Wald Ratio | 1 | 0.99 | 0.91 | 1.07 | 0.746 |
| cg03603530 | 16 | 69365009  | <i>RP11-343C2.12, PDF, COG8</i>    | Wald Ratio | 1 | 1.03 | 0.97 | 1.08 | 0.362 |
| cg14330293 | 17 | 1374051   | <i>MYO1C</i>                       | Wald Ratio | 1 | 0.97 | 0.85 | 1.11 | 0.668 |
| cg05465916 | 17 | 7819762   | <i>AC025335.1</i>                  | Wald Ratio | 1 | 1.02 | 0.93 | 1.11 | 0.672 |
| cg01735398 | 17 | 18907305  | <i>SLC5A10</i>                     | Wald Ratio | 1 | 1.07 | 0.93 | 1.24 | 0.339 |
| cg22332722 | 18 | 25754857  | <i>CDH2</i>                        | Wald Ratio | 1 | 1.04 | 0.94 | 1.15 | 0.406 |
| cg16705273 | 18 | 42262885  | <i>SETBP1</i>                      | IVW        | 2 | 0.97 | 0.9  | 1.04 | 0.393 |
| cg15059065 | 19 | 17354961  | <i>NR2F6, AC010646.3</i>           | IVW        | 2 | 0.99 | 0.94 | 1.05 | 0.831 |
| cg22052056 | 20 | 31351813  | <i>DNMT3B</i>                      | Wald Ratio | 1 | 1.02 | 0.9  | 1.15 | 0.733 |
| cg14391586 | 20 | 62681296  | <i>SOX18</i>                       | Wald Ratio | 1 | 0.99 | 0.95 | 1.05 | 0.826 |
| cg00549412 | 21 | 43933482  | <i>SLC37A1</i>                     | Wald Ratio | 1 | 0.99 | 0.91 | 1.08 | 0.829 |

**Table S9. Characteristics of CRC incident cases and population-based controls nested in the UK Biobank.**

| <b>Characteristics</b>               | <b>Cases</b>     | <b>Controls</b> | <b>Overall</b> |             |
|--------------------------------------|------------------|-----------------|----------------|-------------|
| <b>Age at recruitment, mean (SD)</b> | 61.7 (6.2)       | 61.8 (6.3)      | 61.8 (6.3)     |             |
| <b>Gender, n (%)</b>                 | Male             | 702 (37.1)      | 3671 (39.1)    | 4373 (38.8) |
|                                      | Female           | 1190 (62.9)     | 5715 (60.9)    | 6905 (61.2) |
| <b>BMI, n (%)</b>                    | Normal weight    | 519 (27.4)      | 2836 (30.2)    | 3355 (29.7) |
|                                      | Overweight       | 886 (46.8)      | 4423 (47.1)    | 5309 (47.1) |
|                                      | Obese            | 472 (24.9)      | 2075 (22.1)    | 2547 (22.6) |
|                                      | Underweight      | 5 (0.3)         | 26 (0.3)       | 31 (0.3)    |
|                                      | NA               | 10 (0.5)        | 26 (0.3)       | 36 (0.3)    |
| <b>Smoking status, n (%)</b>         | Current smoker   | 174 (9.2)       | 823 (8.8)      | 997 (8.8)   |
|                                      | Previous smoker  | 888 (46.9)      | 3811 (40.6)    | 4699 (41.7) |
|                                      | Never smoker     | 823 (43.5)      | 4718 (50.3)    | 5541 (49.1) |
|                                      | NA               | 7 (0.4)         | 34 (0.4)       | 41 (0.4)    |
| <b>Aspirin use, n (%)</b>            | User             | 359 (19.0)      | 1775 (18.9)    | 2134 (18.9) |
|                                      | Non-user         | 1512 (79.9)     | 7508 (80.0)    | 9020 (80.0) |
|                                      | NA               | 21 (1.1)        | 103 (1.1)      | 124 (1.1)   |
| <b>Drinking status, n (%)</b>        | Never drinker    | 81 (4.3)        | 456 (4.9)      | 537 (4.8)   |
|                                      | Light drinker    | 491 (26.0)      | 2720 (29.0)    | 3211 (28.5) |
|                                      | Moderate drinker | 998 (52.7)      | 5119 (54.5)    | 6117 (54.2) |
|                                      | Heavy drinker    | 322 (17.0)      | 1091 (11.6)    | 1413 (12.5) |
| <b>Genotype of rs3087967, n (%)</b>  | CC               | 193 (10.2)      | 876 (9.3)      | 1069 (9.5)  |
|                                      | CT               | 838 (44.3)      | 4030 (42.9)    | 4868 (43.2) |
|                                      | TT               | 861 (45.5)      | 4480 (47.7)    | 5341 (47.4) |



## Supplementary figures

Figure S1. Flowchart of the selection of eligible studies for meta-analysis.

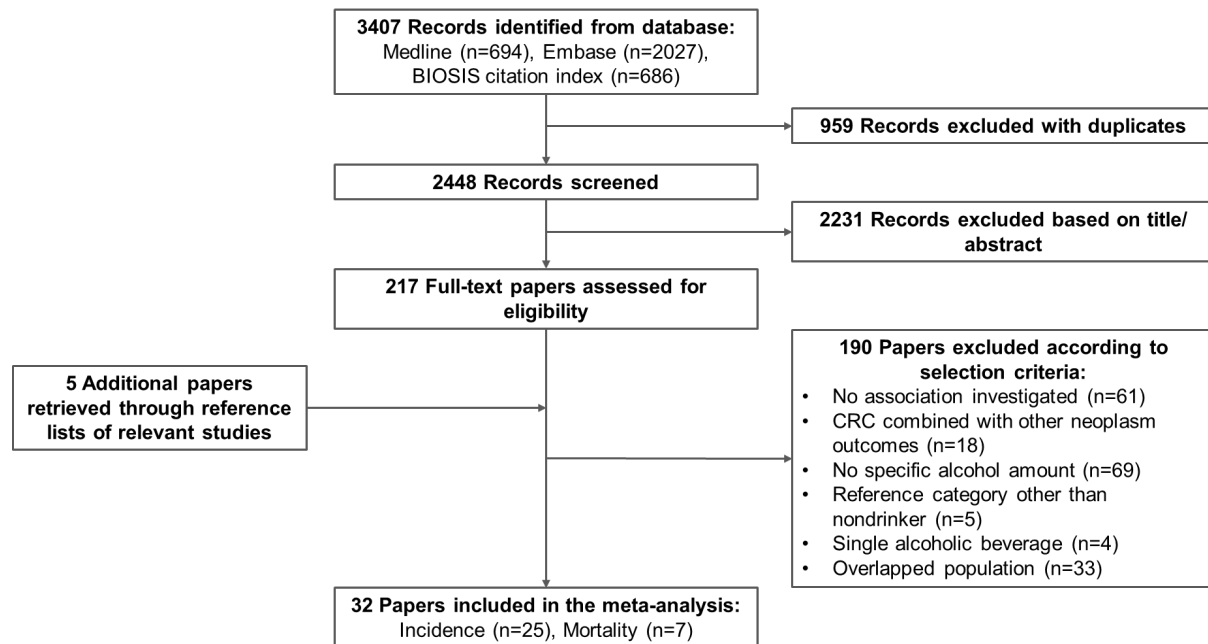

CRC, colorectal cancer.

Figure S2. Pooled RR of CRC risk for light, moderate and heavy drinkers in the meta-analysis. Light, <12.5 g/d; Moderate, 12.5-50 g/d; Heavy, >50 g/d.

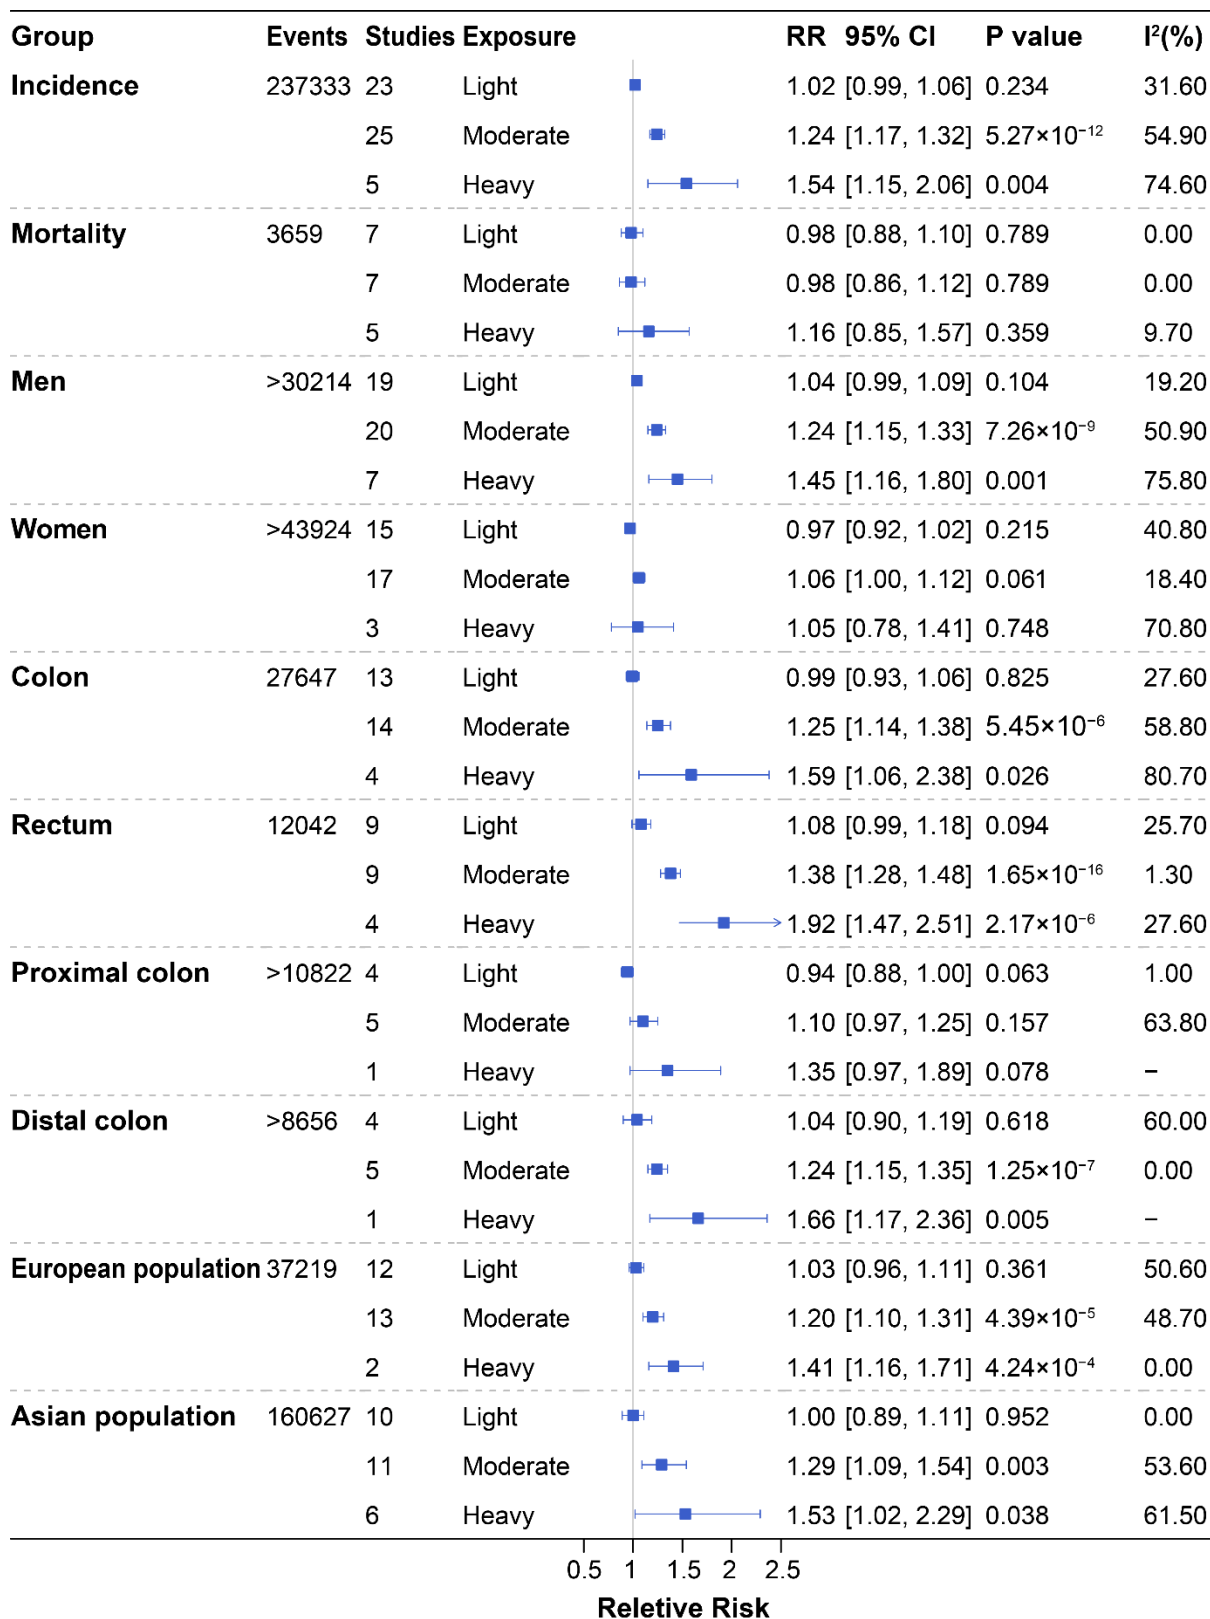

**Figure S3. Dose-response effect of alcohol drinking on CRC risk.**

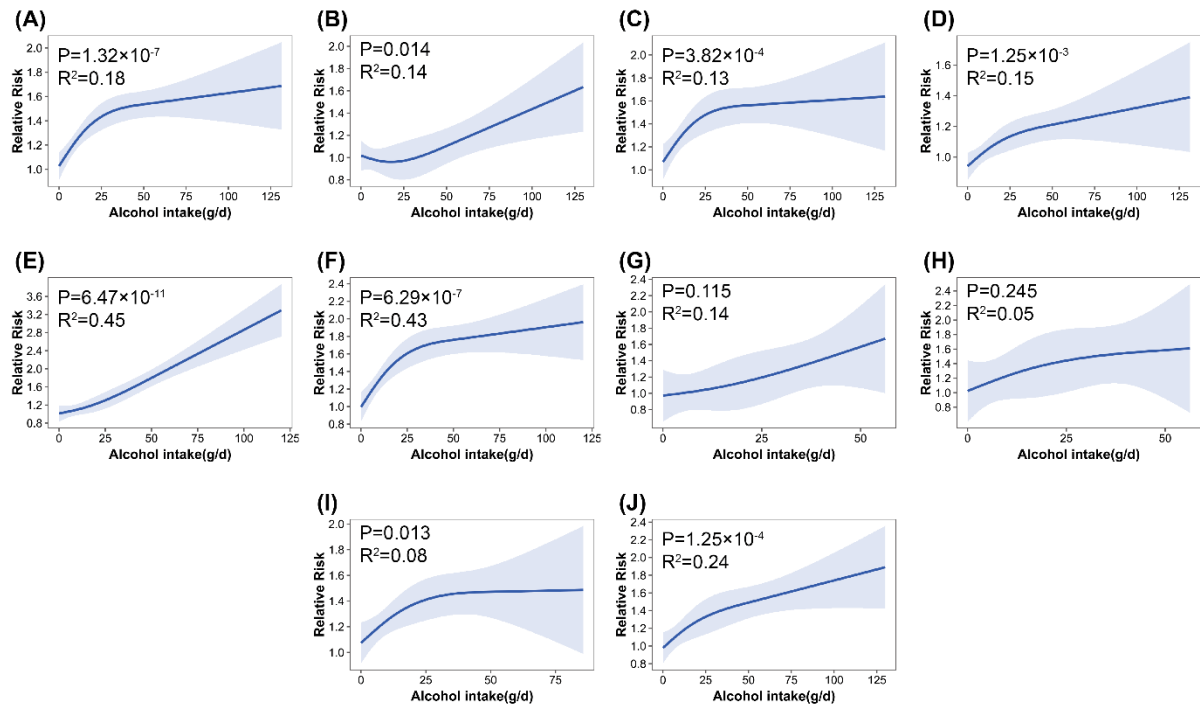

R<sup>2</sup>, adjusted R-square of the cubic-spline model. (A) Risk of CRC incidence; (B) Risk of CRC mortality; (C) Risk of men drinkers; (D) Risk of women drinkers; (E) Risk of rectum cancer; (F) Risk of colon cancer; (G) Risk of proximal colon cancer; (H) Risk of distal colon cancer; (I) Risk of European mainly population; (J) Risk of Asian mainly population.

**Figure S4. Regional plots of cg10045354 and mapped genes.**

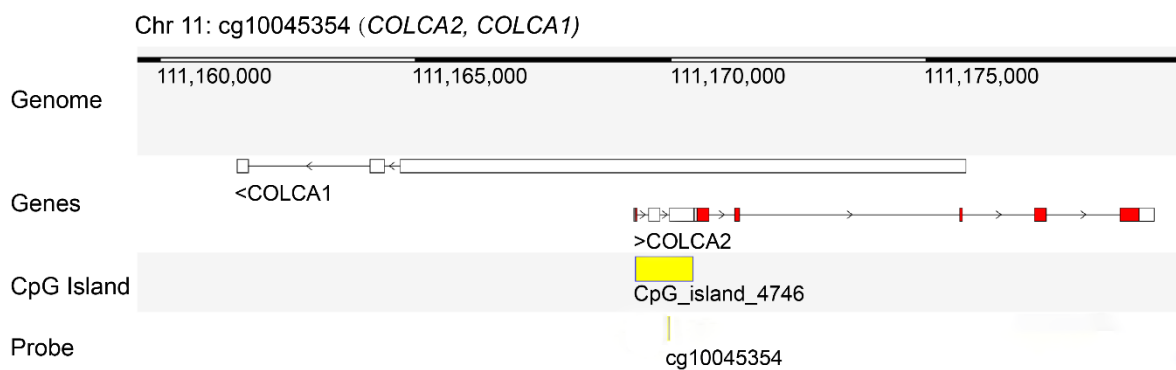

Figure S5. Single-tissue eQTL plot of rs11213823 (cg10045354, COLCA2).

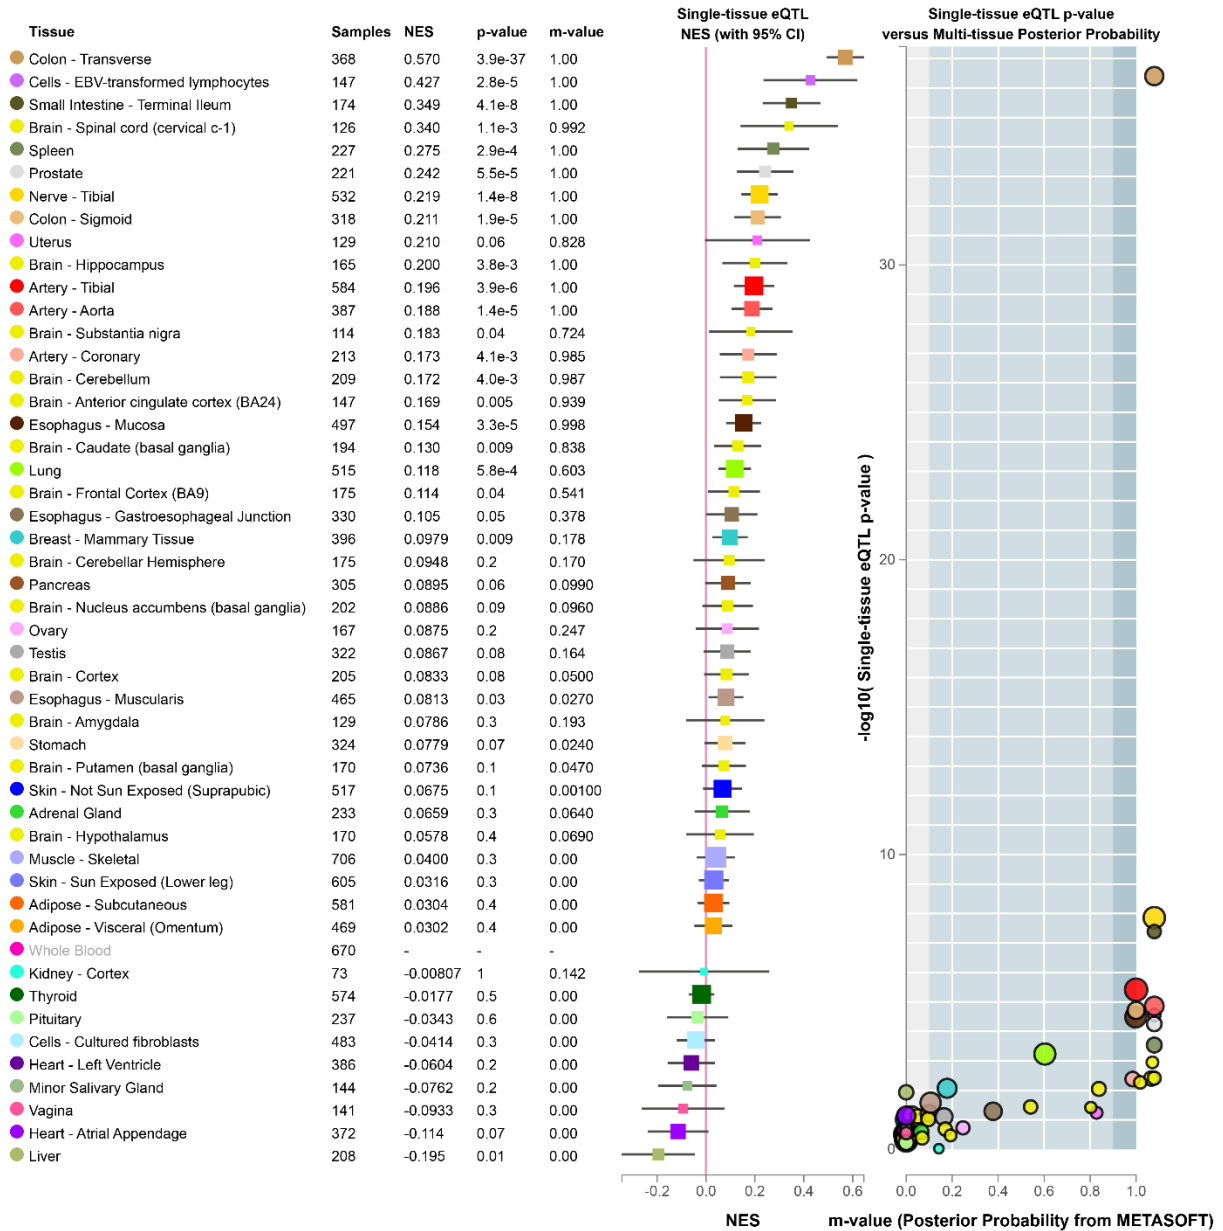

NES, normalized effect size. m value, the posterior probability that an eQTL effect exists in each tissue tested in the cross-tissue meta-analysis. Small m value (e.g., <0.1), the tissue is predicted to NOT have an eQTL effect; large m value (e.g., >0.9), the tissue is predicted to Have an eQTL effect; otherwise, the prediction of the existence of an eQTL effect is ambiguous.

Figure S6. Single-tissue eQTL plot of rs11213823 (cg10045354, COLCA1).

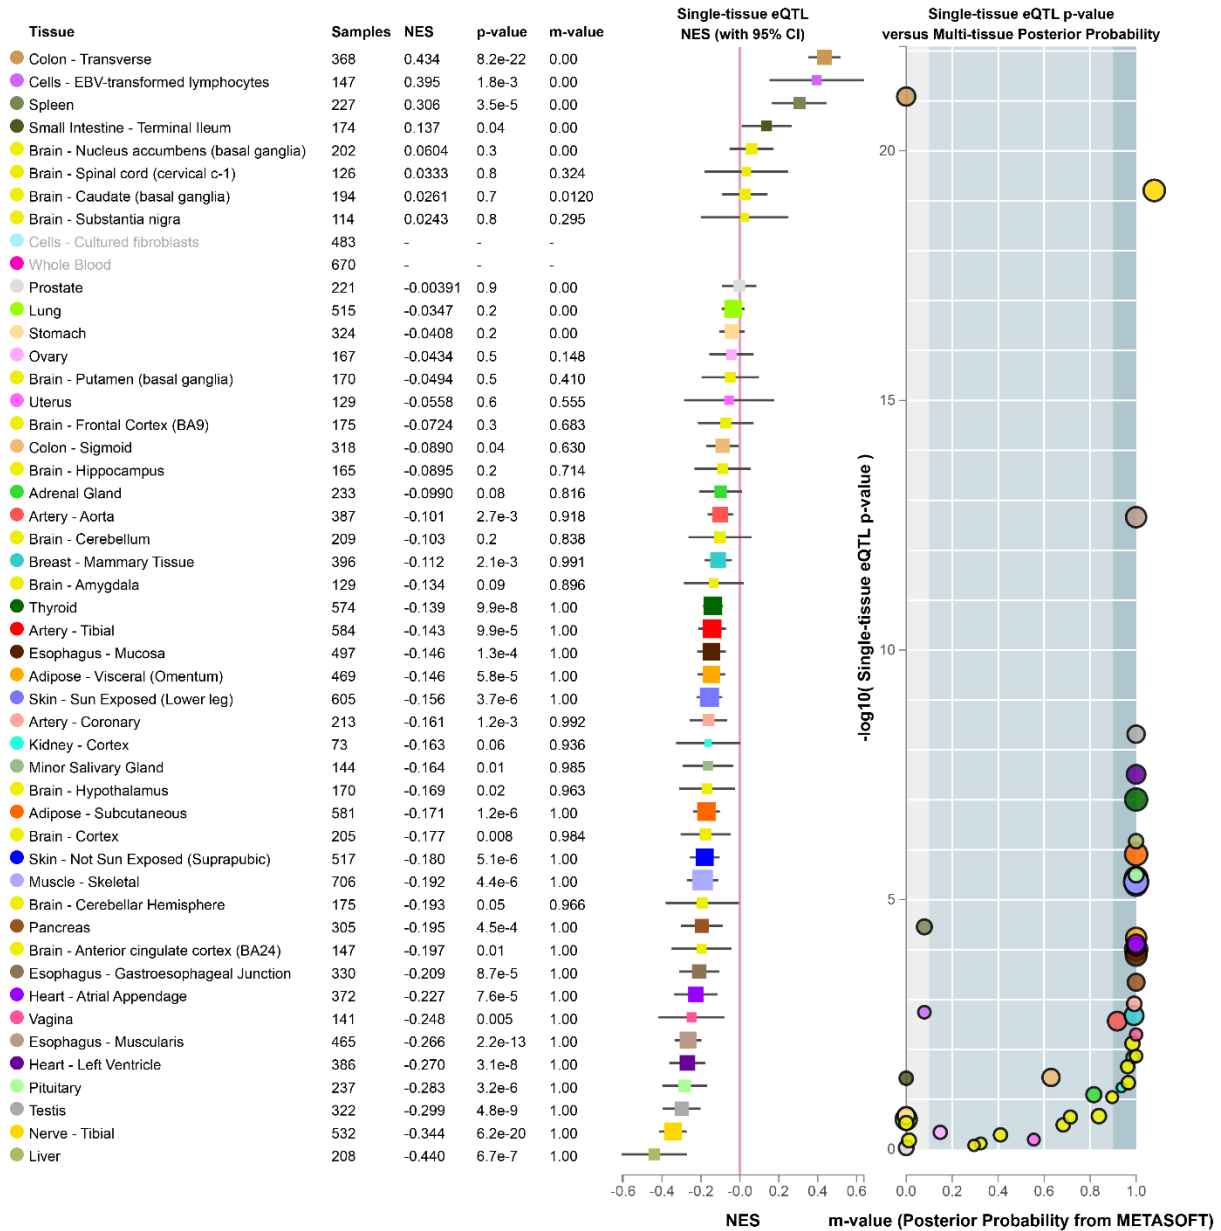

NES, normalized effect size. m value, the posterior probability that an eQTL effect exists in each tissue tested in the cross-tissue meta-analysis. Small m value (e.g., <0.1), the tissue is predicted to NOT have an eQTL effect; large m value (e.g., >0.9), the tissue is predicted to Have an eQTL effect; otherwise, the prediction of the existence of an eQTL effect is ambiguous.
